# Supplementary material for: Tissue and Process Specific microRNA–mRNA Co-Expression in Mammalian Development and Malignancy
Source: PubMed Central journal article supplement (PMC2673043; doi:10.1371/journal.pone.0005436), 2009-05-05
Supplement: pone.0005436.s002.pdf [file pone.0005436.s002.pdf]

**Supple. Table 1: miRNA expression data of developing mouse lung**

| miRNA Name       | D1 $\Delta$ CT | D14 $\Delta$ CT | Number of coherent genes using TargetScanS | Number of Non-coherent genes using TargetScanS | Number of coherent genes using PITA | Number of Non-coherent genes using PITA | Number of coherent genes using picTar | Number of Non-coherent genes using picTar |
|------------------|----------------|-----------------|--------------------------------------------|------------------------------------------------|-------------------------------------|-----------------------------------------|---------------------------------------|-------------------------------------------|
| miR-144          | 18.64973       | 18.06525        | 21                                         | 18                                             | 105                                 | 126                                     | 96                                    | 97                                        |
| miR-27           | 10.61053       | 7.411875        | 92                                         | 94                                             | 129                                 | 173                                     | 116                                   | 148                                       |
| miR-30           | 9.588775       | 6.046125        | 150                                        | 190                                            | 144                                 | 209                                     | 83                                    | 126                                       |
| miR-25/32/92/367 | 8.19715        | 7.10915         | 90                                         | 120                                            | 74                                  | 107                                     | 63                                    | 83                                        |
| miR-17/20/106    | 17.75553       | 16.30388        | 100                                        | 161                                            | 107                                 | 195                                     | 90                                    | 141                                       |
| miR-155          | 19.01839       | 18.46817        | 38                                         | 53                                             | 52                                  | 64                                      | 31                                    | 43                                        |
| miR-133          | 10.3994        | 7.888725        | 67                                         | 64                                             | 54                                  | 71                                      | 63                                    | 62                                        |
| miR-26           | 5.258675       | 3.074125        | 98                                         | 112                                            | 83                                  | 106                                     | 73                                    | 84                                        |
| let-7/miR-98     | 6.344963       | 5.98065         | 98                                         | 106                                            | 87                                  | 102                                     | 90                                    | 105                                       |
| miR-15/16/195    | 10.91528       | 8.10125         | 114                                        | 143                                            | 154                                 | 196                                     | 117                                   | 141                                       |
| miR-96           | 13.5754        | 12.88683        | 48                                         | 64                                             | 59                                  | 92                                      | 96                                    | 159                                       |
| miR-148/152      | 9.598825       | 9.29305         | 69                                         | 94                                             | 97                                  | 128                                     | 60                                    | 86                                        |
| miR-146          | 8.9214         | 5.821775        | 24                                         | 23                                             | 31                                  | 37                                      | 21                                    | 20                                        |
| miR-221/222      | 10.64427       | 9.70605         | 48                                         | 47                                             | 50                                  | 76                                      | 48                                    | 48                                        |
| miR-103/107      | 7.768275       | 6.5137          | 52                                         | 93                                             | 61                                  | 92                                      | 113                                   | 138                                       |
| miR-223          | 9.439363       | 8.463225        | 38                                         | 36                                             | 46                                  | 48                                      | 35                                    | 28                                        |
| miR-139          | 13.3194        | 12.39555        | 54                                         | 53                                             | 80                                  | 106                                     | 48                                    | 50                                        |
| miR-142-3p       | 8.28365        | 4.737925        | 35                                         | 39                                             | 47                                  | 50                                      | 31                                    | 42                                        |
| miR-140          | 8.94415        | 7.200783        | 23                                         | 41                                             | 46                                  | 68                                      | 29                                    | 49                                        |
| miR-145          | 6.77855        | 5.0909          | 71                                         | 80                                             | 74                                  | 95                                      | 37                                    | 52                                        |
| miR-216          | 23.60846       | 22.13838        | 25                                         | 21                                             | 63                                  | 70                                      | 27                                    | 13                                        |
| miR-21           | 7.355375       | 6.3379          | 30                                         | 31                                             | 49                                  | 52                                      | 28                                    | 32                                        |
| miR-182          | 11.46359       | 10.73743        | 88                                         | 129                                            | 90                                  | 123                                     | 100                                   | 153                                       |
| miR-23           | 8.281625       | 5.119725        | 108                                        | 132                                            | 138                                 | 154                                     | 72                                    | 82                                        |
| miR-194          | 12.17366       | 10.27008        | 56                                         | 41                                             | 48                                  | 54                                      | 41                                    | 33                                        |
| miR-125          | 6.693525       | 4.647325        | 74                                         | 92                                             | 130                                 | 142                                     | 67                                    | 90                                        |
| miR-34           | 9.513425       | 8.518383        | 59                                         | 93                                             | 67                                  | 98                                      | 56                                    | 93                                        |

|                    |          |          |     |     |     |     |     |     |
|--------------------|----------|----------|-----|-----|-----|-----|-----|-----|
| miR-99/100         | 9.19665  | 6.454675 | 5   | 7   | 11  | 5   | 6   | 5   |
| miR-187            | 12.86079 | 11.0627  | 1   | 1   | 10  | 11  | 1   | 2   |
| miR-9              | 16.55438 | 14.92983 | 150 | 170 | 128 | 145 | 136 | 151 |
| miR-138            | 21.40277 | 20.72238 | 58  | 53  | 55  | 79  | 54  | 49  |
| miR-122            | 15.06327 | 18.35255 | 30  | 26  | 25  | 30  | 26  | 26  |
| miR-128            | 16.72123 | 16.916   | 109 | 75  | 139 | 127 | 131 | 95  |
| miR-124            | 16.95443 | 17.18138 | 279 | 211 | 216 | 143 | 155 | 117 |
| miR-204/211        | 13.10046 | 13.18258 | 64  | 60  | 97  | 77  | 63  | 64  |
| miR-219            | 16.10836 | 16.12708 | 54  | 33  | 43  | 28  | 44  | 29  |
| miR-218            | 8.471388 | 8.82405  | 90  | 86  | 119 | 100 | 84  | 81  |
| miR-199a*          | 5.094263 | 5.40965  | 59  | 40  | 152 | 112 | 51  | 31  |
| miR-181            | 8.292838 | 9.457625 | 135 | 103 | 179 | 130 | 103 | 72  |
| miR-137            | 14.86303 | 16.33598 | 94  | 64  | 124 | 99  | 84  | 51  |
| miR-130/301        | 5.569475 | 5.25505  | 96  | 63  | 141 | 92  | 112 | 82  |
| miR-93/302/372/373 | 21.17381 | 21.30805 | 79  | 56  | 188 | 119 | 153 | 101 |
| miR-184            | 15.46129 | 16.6552  | 5   | 4   | 8   | 4   | 5   | 4   |

red-- early miRNA

blue-- late miRNA

$\Delta$ CT --- The relative expression of individual miRNA determined by normalization, the lower the value the higher the expression (Williams et al. 06)
