# Supplementary material for: Tissue and Process Specific microRNA–mRNA Co-Expression in Mammalian Development and Malignancy
Source: PubMed Central journal article supplement (PMC2673043; doi:10.1371/journal.pone.0005436), 2009-05-05
Supplement: pone.0005436.s003.pdf [file pone.0005436.s003.pdf]

**Supple. Table 2: (a) Significant miRNAs in developing cerebellum for their *non-coherent* targets using PITA target prediction**

| miRNA Name  | Dev Status | Num and % of non-coherent genes | Log2 (P60/P7) of the miR | Ave. Log FC offset | P-val (a) | P-val (b) |
|-------------|------------|---------------------------------|--------------------------|--------------------|-----------|-----------|
| miR-218     | Late       | 113/50.45%                      | 4.616292                 | 0.036427           | 2.18E-05  | 2.71E-06  |
| miR-128     | Late       | 126/47.37%                      | 2.768346                 | 0.038908           | 0.000314  | 1.81E-05  |
| miR-9       | Late       | 125/44.96%                      | 1.509503                 | 0.028307           | 0.000566  | 0.025436  |
| miR-223     | Late       | 51/54.84%                       | 1.61471                  | 0.060392           | 0.000798  | 0.000105  |
| miR-101     | Late       | 90/50.28%                       | 1.04182                  | 0.039592           | 0.000936  | 4.95E-05  |
| miR-22      | Late       | 72/49.32%                       | 2.979534                 | 0.032203           | 0.001139  | 0.000302  |
| miR-15      | Late       | 191/53.80%                      | 1.04388                  | 0.026339           | 0.001587  | 0.005781  |
| miR-152     | Late       | 117/51.77%                      | 1.617594                 | 0.030899           | 0.001633  | 0.000511  |
| miR-26a     | Late       | 81/41.75%                       | 4.019567                 | 0.03018            | 0.001645  | 6.97E-07  |
| miR-138     | Late       | 66/48.18%                       | 1.198933                 | 0.042794           | 0.001938  | 0.000258  |
| miR-140     | Late       | 57/48.31%                       | 0.07215                  | 0.050947           | 0.002863  | 0.000792  |
| miR-30b     | Late       | 164/46.59%                      | 5.209189                 | 0.02391            | 0.003665  | 6.23E-06  |
| miR-23b     | Late       | 131/44.86%                      | 2.222801                 | 0.028613           | 0.007018  | 0.000354  |
| miR-21      | Late       | 47/44.34%                       | 2.499411                 | 0.033742           | 0.008013  | 2.51E-05  |
| miR-34a     | Late       | 85/49.71%                       | 3.595011                 | 0.032114           | 0.00816   | 0.019762  |
| miR-124a    | Late       | 165/45.08%                      | 1.56764                  | 0.020025           | 0.01043   | 0.023291  |
| miR-103-1,2 | Late       | 80/50.96%                       | 1.604302                 | 0.031486           | 0.011758  | 9.05E-05  |
| miR-143     | Late       | 38/36.89%                       | 2.251073                 | 0.041221           | 0.01301   | 0.006364  |
| miR-137     | Late       | 121/53.54%                      | 0.5025                   | 0.019597           | 0.020149  | 0.000397  |
| miR-146     | Late       | 32/45.07%                       | 1.485427                 | 0.052332           | 0.020629  | 0.017074  |
| miR-27b     | Late       | 157/50.81%                      | 2.859174                 | 0.021974           | 0.021523  | 3.2E-05   |
| miR-204     | Late       | 91/51.41%                       | 4.125559                 | 0.019943           | 0.04274   | 0.001557  |

**(b) Significant miRNAs in developing cerebellum for their *coherent* targets using PITA prediction**

| miRNA Name | Dev Status | Num and % of coherent genes | Log2 (P60/P7) of the miR | Ave. Log FC offset | P-val (a) | P-val (b) |
|------------|------------|-----------------------------|--------------------------|--------------------|-----------|-----------|
| miR-106    | Early      | 159/52.13%                  | -3.92851                 | 0.032273           | 4.52E-05  | 1.19E-07  |
| miR-153    | Early      | 68/43.31%                   | -0.61005                 | 0.062804           | 0.000132  | 9.69E-07  |
| miR-93     | Early      | 159/51.29%                  | -3.27162                 | 0.026879           | 0.001084  | 8.17E-06  |
| miR-181a   | Early      | 137/44.92%                  | -0.24233                 | 0.026831           | 0.002137  | 4.2E-06   |
| miR-33     | Early      | 57/50.89%                   | -0.96829                 | 0.055088           | 0.002659  | 0.004891  |
| miR-144    | Early      | 112/47.86%                  | -1.41504                 | 0.025118           | 0.002885  | 3.22E-07  |
| miR-122a   | Early      | 26/46.43%                   | -2.46211                 | 0.055649           | 0.005033  | 0.001678  |
| miR-130    | Early      | 135/56.72%                  | -1.65573                 | 0.020435           | 0.02219   | 0.010855  |
| miR-19a    | Early      | 154/52.03%                  | -2.48543                 | 0.015592           | 0.032569  | 0.000428  |
| miR-219    | Early      | 36/53.73%                   | -0.79837                 | 0.033928           | 0.041059  | 0.000461  |
