# Supplementary material for: Tissue and Process Specific microRNA–mRNA Co-Expression in Mammalian Development and Malignancy
Source: PubMed Central journal article supplement (PMC2673043; doi:10.1371/journal.pone.0005436), 2009-05-05
Supplement: pone.0005436.s004.pdf [file pone.0005436.s004.pdf]

**Supple. Table 3: (a) Significant miRNAs in developing cerebellum comparing their *non-coherent* targets with non- target control gene set using picTar target prediction**

| miRNA Name | Dev Status | Num and % of non-coherent genes | Log2 (P60/P7) of the miR | Ave. Log FC offset | P-val (a) | P-val (b) |
|------------|------------|---------------------------------|--------------------------|--------------------|-----------|-----------|
| miR-15     | Late       | 152/55.88%                      | 1.04388                  | 0.033519           | 2.49E-05  | 6.56E-06  |
| miR-103    | Late       | 154/57.68%                      | 1.604302                 | 0.032488           | 5.38E-05  | 2.91E-06  |
| miR-133    | Late       | 68/50.75%                       | 2.46536                  | 0.045648           | 0.001881  | 0.048472  |
| miR-139    | Late       | 49/47.57%                       | 0.628031                 | 0.04054            | 0.005143  | 0.003694  |
| miR-34a    | Late       | 77/48.73%                       | 3.595011                 | 0.037374           | 0.006268  | 0.0473    |
| miR-204    | Late       | 63/47.01%                       | 4.125559                 | 0.021657           | 0.007438  | 0.025169  |
| miR-128    | Late       | 120/51.28%                      | 2.768346                 | 0.023364           | 0.010097  | 0.005491  |
| miR-152    | Late       | 92/58.60%                       | 1.617594                 | 0.02482            | 0.01207   | 0.002477  |
| miR-30b    | Late       | 100/45.05%                      | 5.209189                 | 0.02428            | 0.014392  | 0.001471  |
| miR-218    | Late       | 100/56.50%                      | 4.616292                 | 0.018837           | 0.030385  | 0.008872  |
| miR-206    | Late       | 104/48.37%                      | 1.479038                 | 0.037287           | 0.03441   | 0.001291  |
| miR-9      | Late       | 157/53.04%                      | 1.509503                 | 0.018775           | 0.036143  | 0.006808  |
| miR-124a   | Late       | 127/43.79%                      | 1.56764                  | 0.020822           | 0.043852  | 0.002916  |

**(b) Significant miRNAs in developing cerebellum for their *coherent* targets using picTar target prediction**

| miRNA Name | Dev Status | Num and % of coherent genes | Log2 (P60/P7) of the miR | Ave. Log FC offset | P-val (a) | P-val (b) |
|------------|------------|-----------------------------|--------------------------|--------------------|-----------|-----------|
| miR-19a    | Early      | 131/52.19%                  | -2.48543                 | 0.031998           | 1.14E-05  | 8.36E-10  |
| miR-106    | Early      | 135/55.79%                  | -3.92851                 | 0.032893           | 2.34E-05  | 6.78E-08  |
| miR-93     | Early      | 136/51.32%                  | -3.27162                 | 0.030942           | 0.000133  | 7.69E-09  |
| miR-144    | Early      | 98/47.57%                   | -1.41504                 | 0.030625           | 0.001148  | 0.025833  |
| miR-130    | Early      | 120/57.97%                  | -1.65573                 | 0.021509           | 0.002914  | 0.00288   |
| miR-153    | Early      | 72/49.32%                   | -0.61005                 | 0.040856           | 0.005503  | 0.003133  |
| miR-181a   | Early      | 86/48.04%                   | -0.24233                 | 0.027922           | 0.005632  | 1.62E-09  |
| miR-184    | Early      | 5/50%                       | -0.45943                 | 0.12286            | 0.006003  | 0.005582  |
| miR-33     | Early      | 43/56.58%                   | -0.96829                 | 0.046944           | 0.012599  | 0.000676  |
