# Supplementary material for: Tissue and Process Specific microRNA–mRNA Co-Expression in Mammalian Development and Malignancy
Source: PubMed Central journal article supplement (PMC2673043; doi:10.1371/journal.pone.0005436), 2009-05-05
Supplement: pone.0005436.s005.pdf [file pone.0005436.s005.pdf]

**Supple. Table 4: Significant miRNAs for their targets' coherence or non-coherence in developing murine lung (TargetScan prediction is used)**

| <b>Significant miRNAs in lung dev in terms of coherent targets</b>     |                                                       |                                                         |                |                 |                   |
|------------------------------------------------------------------------|-------------------------------------------------------|---------------------------------------------------------|----------------|-----------------|-------------------|
| <b>miRNA Name</b>                                                      | <b>[B] coherent targets of miR Ave. (Expr/P1)</b>     | <b>[C] non-target background genes Ave Log(Expr/P1)</b> | <b>[B]-[C]</b> | <b>p-val</b>    | <b>Dev Status</b> |
| miR-9                                                                  | -0.40858751                                           | -0.475963001                                            | 0.067375       | <b>0.007959</b> | Late              |
| miR-27                                                                 | -0.39621753                                           | -0.475963001                                            | 0.079745       | <b>0.01019</b>  | Late              |
| miR-125                                                                | -0.32390459                                           | -0.475963001                                            | 0.152058       | <b>0.016996</b> | Late              |
| miR-26                                                                 | -0.34696609                                           | -0.475963001                                            | 0.128997       | <b>0.018557</b> | Late              |
| miR-15/16/195                                                          | -0.39837816                                           | -0.475963001                                            | 0.077585       | <b>0.020269</b> | Late              |
| miR-17/20/106                                                          | -0.35880559                                           | -0.475963001                                            | 0.117157       | <b>0.028752</b> | Late              |
| miR-221/222                                                            | -0.32698334                                           | -0.475963001                                            | 0.14898        | <b>0.046226</b> | Late              |
| miR-199a*                                                              | 0.33455485                                            | 0.528275843                                             | -0.19372       | <b>0.002028</b> | Early             |
| miR-204/211                                                            | 0.35054426                                            | 0.528275843                                             | -0.17773       | <b>0.014702</b> | Early             |
| <b>Significant miRNAs in lung dev in terms of non-coherent targets</b> |                                                       |                                                         |                |                 |                   |
| <b>miRNA Name</b>                                                      | <b>[B] non-coherent targets of miR Ave. (Expr/P1)</b> | <b>[C] non-target background genes Ave Log(Expr/P1)</b> | <b>[B]-[C]</b> | <b>p-val</b>    | <b>Dev Status</b> |
| miR-146                                                                | 0.72673295                                            | 0.528275843                                             | 0.198457       | <b>0.024069</b> | Late              |
| miR-140                                                                | 0.7265038                                             | 0.528275843                                             | 0.198228       | <b>0.031186</b> | Late              |
| miR-125                                                                | 0.40082517                                            | 0.528275843                                             | -0.12745       | <b>0.03391</b>  | Late              |
| miR-34                                                                 | 0.39731154                                            | 0.528275843                                             | -0.13096       | <b>0.043318</b> | Late              |
| miR-205                                                                | -0.31139753                                           | -0.475963001                                            | 0.164565       | <b>0.003512</b> | Early             |
| miR-124                                                                | -0.37628123                                           | -0.475963001                                            | 0.099682       | <b>0.007991</b> | Early             |
| miR-218                                                                | -0.38952386                                           | -0.475963001                                            | 0.086439       | <b>0.017277</b> | Early             |
