# Supplementary material for: Tissue and Process Specific microRNA–mRNA Co-Expression in Mammalian Development and Malignancy
Source: PubMed Central journal article supplement (PMC2673043; doi:10.1371/journal.pone.0005436), 2009-05-05
Supplement: pone.0005436.s006.pdf [file pone.0005436.s006.pdf]

**Supple. Table 5: Enriched Late-miR-non-coherent GO terms in developing Cerebellum compared with non-targets of the same term**

| GO terms                        | Term ID | p-val<br>(median)<br>of non-<br>coherent<br>targets vs.<br>non-miR<br>target<br>gene<br>bkgd | LogFC<br>Val<br>(median)<br>of non-<br>coherent<br>targets vs.<br>non-miR<br>target<br>gene<br>bkgd | # of<br>miR<br>incid<br>ence<br>s in<br>Dev. | miR<br>Names                                                |
|---------------------------------|---------|----------------------------------------------------------------------------------------------|-----------------------------------------------------------------------------------------------------|----------------------------------------------|-------------------------------------------------------------|
| 'cell communication'            | 720     | 0.000719                                                                                     | 0.066217                                                                                            | 1                                            | mir-138                                                     |
| 'signal transduction'           | 1345    | 0.015308                                                                                     | 0.051985                                                                                            | 1                                            | mir-138                                                     |
| 'cell differentiation'          | 521     | 0.021536                                                                                     | 0.069223                                                                                            | 1                                            | mir-9                                                       |
| 'cell-cell signaling'           | 912     | 0.006455                                                                                     | 0.116323                                                                                            | 6                                            | mir-103-1, mir-128 mir-143 mir-133 mir-9 mir-138            |
| 'transmission of nerve impulse' | 176     | 0.015832                                                                                     | 0.160208                                                                                            | 6                                            | mir-128 mir-133 mir-206 mir-152 mir-9 mir-138               |
| 'synaptic transmission'         | 552     | 0.015832                                                                                     | 0.160208                                                                                            | 6                                            | mir-128 mir-133 mir-206 mir-152 mir-9 mir-138               |
| 'localization'                  | 1067    | 0.010958                                                                                     | 0.061464                                                                                            | 7                                            | mir-103-1, mir-128 mir-218-1, mir-23b mir-21 mir-15 mir-138 |
| 'establishment of localization' | 1253    | 0.01128                                                                                      | 0.061246                                                                                            | 7                                            | mir-103-1, mir-128 mir-218-1, mir-23b mir-21 mir-15 mir-138 |
| 'transport'                     | 869     | 0.012925                                                                                     | 0.074536                                                                                            | 2                                            | mir-23b mir-138                                             |
| 'secretion'                     | 287     | 0.024885                                                                                     | 0.137663                                                                                            | 3                                            | mir-103-1, mir-34a mir-138                                  |
| 'vesicle-mediated transport'    | 1527    | 0.00957                                                                                      | 0.150005                                                                                            | 1                                            | mir-128                                                     |
| 'secretory pathway'             | 1714    | 0.022198                                                                                     | 0.188268                                                                                            | 2                                            | mir-128 mir-34a                                             |
| 'exocytosis'                    | 1251    | 0.041026                                                                                     | 0.190668                                                                                            | 1                                            | mir-128                                                     |
