# Supplementary material for: Tissue and Process Specific microRNA–mRNA Co-Expression in Mammalian Development and Malignancy
Source: PubMed Central journal article supplement (PMC2673043; doi:10.1371/journal.pone.0005436), 2009-05-05
Supplement: pone.0005436.s007.pdf [file pone.0005436.s007.pdf]

**Supple. Table 6: The enriched processes of non-coherent genes of miRNA targets common in cerebellum development and Medulloblastoma using TargetScans prediction**

**Synaptic Transmission Genes**

| <i>ENTREZ</i> | <i>Gene Name</i>                   | <i>Corr.of two series</i> | <i>GENE_SYMBOL</i> | <i>CYTOBAND</i> |
|---------------|------------------------------------|---------------------------|--------------------|-----------------|
| 6506          | SOLUTE CARRIER FAMILY 1 (GLIAL HIG | 0.840304376               | SLC1A2,            | 11p13-p12,      |
| 6324          | SODIUM CHANNEL, VOLTAGE-GATED,     | 0.915801667               | SCN1B,             | 19q13.1,        |
| 2571          | GLUTAMATE DECARBOXYLASE 1 (BRA     | 0.95427565                | GAD1,              | 2q31,           |
| 6857          | SYNAPTOTAGMIN I                    | 0.827120632               | SYT1,              | 12cen-q21,      |
| 6529          | SOLUTE CARRIER FAMILY 6 (NEUROTR   | 0.861383769               | SLC6A1,            | 3p25-p24,       |
| 3778          | POTASSIUM LARGE CONDUCTANCE C      | 0.284979903               | KCNMA1,            | 10q22.3,        |
| 777           | CALCIUM CHANNEL, VOLTAGE-DEPEN     | 0.846770217               | CACNA1E,           | 1q25-q31,       |
| 6616          | SYNAPTOSOMAL-ASSOCIATED PROTE      | 0.96237188                | SNAP25,            | 20p12-p11.2,    |
| 6535          | SOLUTE CARRIER FAMILY 6 (NEUROTR   | 0.955618456               | SLC6A8,            | Xq28,           |
| 23710         | GABA(A) RECEPTOR-ASSOCIATED PR     | 0.908145297               | GABARAPL1,         | 12p13.2,        |
| 4884          | NEURONAL PENTRAXIN I               | 0.752911621               | NPTX1,             | 17q25.1-q25.2,  |
| 3751          | POTASSIUM VOLTAGE-GATED CHANN      | 0.983226321               | KCND2,             | 7q31,           |
| 1742          | DISCS, LARGE HOMOLOG 4 (DROSOPH    | 0.670769114               | DLG4,              | 17p13.1,        |
| 5376          | PERIPHERAL MYELIN PROTEIN 22       | 0.946977847               | PMP22,             | 17p12-p11.2,    |
| 2572          | GLUTAMATE DECARBOXYLASE 2 (PAN     | 0.878199415               | GAD2,              | 10p11.23,       |
| 1837          | DYSTROBREVIN, ALPHA                | 0.984315547               | DTNA,              | 18q12,          |
| 6014          | RAS-LIKE WITHOUT CAAX 2            | 0.835018553               | RIT2,              | 18q12.3,        |
| 3363          | 5-HYDROXYTRYPTAMINE (SEROTONIN     | 0.831016197               | HTR7,              | 10q21-q24,      |

**Exocytosis Genes**

| <i>ENTREZ</i> | <i>Gene Name</i>              | <i>Corr.of two series</i> | <i>GENE_SYMBOL</i> | <i>CYTOBAND</i> |
|---------------|-------------------------------|---------------------------|--------------------|-----------------|
| 6857          | SYNAPTOTAGMIN I               | 0.835018553               | SYT1,              | 12cen-q21,      |
| 6860          | SYNAPTOTAGMIN IV              | 0.66333438                | SYT4,              | 18q12.3,        |
| 286           | ANKYRIN 1, ERYTHROCYTIC       | 0.986182828               | ANK1,              | 8p11.1,         |
| 6616          | SYNAPTOSOMAL-ASSOCIATED PROTE | 0.984315547               | SNAP25,            | 20p12-p11.2,    |

**All 62 genes in the commonly shared two GO term trees (Figure 3b) between cerebellum dev and MB**

| <i>ENTREZ</i> | <i>Gene Name</i>                 | <i>Corr.of two series</i> | <i>GENE_SYMBOL</i> | <i>CYTOBAND</i> |
|---------------|----------------------------------|---------------------------|--------------------|-----------------|
| 286           | ANKYRIN 1, ERYTHROCYTIC          | 0.986182828               | ANK1,              | 8p11.1,         |
| 287           | ANKYRIN 2, NEURONAL              | 0.499512377               | ANK2,              | 4q25-q27,       |
| 375           | ADP-RIBOSYLATION FACTOR 1        | 0.770003861               | ARF1,              | 1q42,           |
| 389           | RAS HOMOLOG GENE FAMILY, MEMBE   | 0.649063954               | RHOC,              | 1p13.1,         |
| 481           | ATPASE, NA+/K+ TRANSPORTING, BET | 0.720173354               | ATP1B1,            | 1q24,           |
| 694           | B-CELL TRANSLOCATION GENE 1, ANT | 0.67326326                | BTG1,              | 12q22,          |
| 777           | CALCIUM CHANNEL, VOLTAGE-DEPEN   | 0.840304376               | CACNA1E,           | 1q25-q31,       |
| 818           | CALCIUM/CALMODULIN-DEPENDENT P   | 0.743515181               | CAMK2G,            | 10q22,          |
| 867           | CAS-BR-M (MURINE) ECOTROPIC RETR | 0.289080968               | CBL,               | 11q23.3,        |
| 1182          | CHLORIDE CHANNEL 3               | 0.811213064               | CLCN3,             | 4q33,           |
| 1399          | V-CRK SARCOMA VIRUS CT10 ONCOG   | 0.873541364               | CRKL,              | 22q11,          |
| 1742          | DISCS, LARGE HOMOLOG 4 (DROSOPH  | 0.915801667               | DLG4,              | 17p13.1,        |
| 1837          | DYSTROBREVIN, ALPHA              | 0.95427565                | DTNA,              | 18q12,          |
| 2046          | EPH RECEPTOR A8                  | 0.705574641               | EPHA8,             | 1p36.12,        |
| 2562          | GAMMA-AMINOBTYRIC ACID (GABA) A  | 0.822395965               | GABRB3,            | 15q11.2-q12,    |

|       |                                    |              |            |                 |
|-------|------------------------------------|--------------|------------|-----------------|
| 2571  | GLUTAMATE DECARBOXYLASE 1 (BRA     | 0.827120632  | GAD1,      | 2q31,           |
| 2572  | GLUTAMATE DECARBOXYLASE 2 (PAN     | 0.861383769  | GAD2,      | 10p11.23,       |
| 2664  | GDP DISSOCIATION INHIBITOR 1       | 0.881671469  | GDI1,      | Xq28,           |
| 2697  | GAP JUNCTION PROTEIN, ALPHA 1, 43  | 0.880085576  | GJA1,      | 6q21-q23.2,     |
| 3091  | HYPOXIA-INDUCIBLE FACTOR 1, ALPH   | -0.058422399 | HIF1A,     | 14q21-q24,      |
| 3363  | 5-HYDROXYTRYPTAMINE (SEROTONIN     | 0.284979903  | HTR7,      | 10q21-q24,      |
| 3742  | POTASSIUM VOLTAGE-GATED CHANN      | 0.930652545  | KCNA6,     | 12p13,          |
| 3751  | POTASSIUM VOLTAGE-GATED CHANN      | 0.846770217  | KCND2,     | 7q31,           |
| 3778  | POTASSIUM LARGE CONDUCTANCE C      | 0.96237188   | KCNMA1,    | 10q22.3,        |
| 3839  | KARYOPHERIN ALPHA 3 (IMPORTIN AL   | 0.36848981   | KPNA3,     | 13q14.3,        |
| 3927  | LIM AND SH3 PROTEIN 1              | 0.50113931   | LASP1,     | 17q11-q21.3,    |
| 4035  | LOW DENSITY LIPOPROTEIN-RELATED    | 0.830517325  | LRP1,      | 12q13-q14,      |
| 4884  | NEURONAL PENTRAXIN I               | 0.955618456  | NPTX1,     | 17q25.1-q25.2,  |
| 5126  | PROPROTEIN CONVERTASE SUBTILIS     | 0.793902945  | PCSK2,     | 20p11.2,        |
| 5376  | PERIPHERAL MYELIN PROTEIN 22       | 0.908145297  | PMP22,     | 17p12-p11.2,    |
| 5861  | RAB1A, MEMBER RAS ONCOGENE FAM     | 0.813275298  | RAB1A,     | 2p14,           |
| 5870  | RAB6A, MEMBER RAS ONCOGENE FAM     | 0.381956075  | RAB6A,     | 11q13.3,        |
| 6014  | RAS-LIKE WITHOUT CAAX 2            | 0.752911621  | RIT2,      | 18q12.3,        |
| 6195  | RIBOSOMAL PROTEIN S6 KINASE, 90KI  | 0.972866082  | RPS6KA1,   | 1p,             |
| 6324  | SODIUM CHANNEL, VOLTAGE-GATED,     | 0.983226321  | SCN1B,     | 19q13.1,        |
| 6334  | SODIUM CHANNEL, VOLTAGE GATED,     | 0.884108207  | SCN8A,     | 12q13,          |
| 6456  | SH3-DOMAIN GRB2-LIKE 2             | 0.893789077  | SH3GL2,    | 9p22,           |
| 6506  | SOLUTE CARRIER FAMILY 1 (GLIAL HIG | 0.670769114  | SLC1A2,    | 11p13-p12,      |
| 6529  | SOLUTE CARRIER FAMILY 6 (NEUROTR   | 0.946977847  | SLC6A1,    | 3p25-p24,       |
| 6535  | SOLUTE CARRIER FAMILY 6 (NEUROTR   | 0.878199415  | SLC6A8,    | Xq28,           |
| 6574  | SOLUTE CARRIER FAMILY 20 (PHOSPH   | 0.939900668  | SLC20A1,   | 2q11-q14,       |
| 6616  | SYNAPTOSOMAL-ASSOCIATED PROTE      | 0.984315547  | SNAP25,    | 20p12-p11.2,    |
| 6812  | SYNTAXIN BINDING PROTEIN 1         | 0.940864845  | STXBP1,    | 9q34.1,         |
| 6857  | SYNAPTOTAGMIN I                    | 0.835018553  | SYT1,      | 12cen-q21,      |
| 6860  | SYNAPTOTAGMIN IV                   | 0.66333438   | SYT4,      | 18q12.3,        |
| 7163  | TUMOR PROTEIN D52                  | 0.935594448  | TPD52,     | 8q21,           |
| 7881  | POTASSIUM VOLTAGE-GATED CHANN      | 0.897360312  | KCNAB1,    | 3q26.1,         |
| 8648  | NUCLEAR RECEPTOR COACTIVATOR 1     | 0.893530357  | NCOA1,     | 2p23,           |
| 8674  | VESICLE-ASSOCIATED MEMBRANE PR     | 0.801066838  | VAMP4,     | 1q24-q25,       |
| 8899  | PRP4 PRE-MRNA PROCESSING FACTO     | 0.852219456  | PRPF4B,    | 6p25.2,         |
| 8997  | KALIRIN, RHOGEF KINASE             | 0.943365465  | KALRN,     | 3q21.1-q21.2, 3 |
| 9475  | RHO-ASSOCIATED, COILED-COIL CON    | 0.929244648  | ROCK2,     | 2p24,           |
| 9900  | SYNAPTIC VESICLE GLYCOPROTEIN 2    | 0.928978401  | SV2A,      | 1q21.2,         |
| 9962  | SOLUTE CARRIER FAMILY 23 (NUCLEO   | 0.708633627  | SLC23A2,   | 20p13,          |
| 10099 | TETRASPANIN 3                      | 0.815377513  | TSPAN3,    | 15q24.3,        |
| 10580 | SORBIN AND SH3 DOMAIN CONTAINING   | 0.707201356  | SORBS1,    | 10q23.3-q24.1,  |
| 10776 | CYCLIC AMP PHOSPHOPROTEIN, 19 KI   | 0.91204233   | ARPP-19,   | 15q21.2,        |
| 23710 | GABA(A) RECEPTOR-ASSOCIATED PR     | 0.831016197  | GABARAPL1, | 12p13.2,        |
| 29993 | PROTEIN KINASE C AND CASEIN KINAS  | 0.886885064  | PACSIN1,   | 6p21.3,         |
| 50650 | RHO GUANINE NUCLEOTIDE EXCHANG     | 0.950115294  | ARHGEF3,   | 3p21-p13,       |
| 54793 | POTASSIUM CHANNEL TETRAMERISAT     | 0.923816164  | KCTD9,     | 8p21.1,         |
| 55861 | CHROMOSOME 20 OPEN READING FRA     | 0.975399971  | C20orf35,  | 20q13.12,       |

==

==  
==

==  
3  
==

§q21.2,

---
