# Supplementary material for: Tissue and Process Specific microRNA–mRNA Co-Expression in Mammalian Development and Malignancy
Source: PubMed Central journal article supplement (PMC2673043; doi:10.1371/journal.pone.0005436), 2009-05-05
Supplement: pone.0005436.s009.pdf [file pone.0005436.s009.pdf]

**Supple. Table 8: Significant GO terms in developing cerebellum comparing targets with non-target control set (PITA target prediction is used)**

|                    |                                 | Gene Ontological term                | p       | off set value of logFC from control sets | # of miRNAs |                                                                  |
|--------------------|---------------------------------|--------------------------------------|---------|------------------------------------------|-------------|------------------------------------------------------------------|
| Non-coherent terms | sort by multiplicity of miRs    | 'transmission of nerve impulse'      | 0.00196 | 0.15073452                               | 13          | mir-125,-128,-137,-139,-140,-146,-218,-27b,-22,-133,-223,-152,-9 |
|                    |                                 | 'synaptic transmission'              | 0.00206 | 0.16730586                               | 12          | mir-125,-128,-139,-140,-146,-218,-27b,-22,-133,-223,-152,-9      |
|                    |                                 | 'transport'                          | 0.00043 | 0.0848964                                | 12          | mir-103,-128,-137,-140,-218,-23b,-27b,-101,-223,-15,-9,-138      |
|                    |                                 | 'synapse'                            | 0.00145 | 0.20002359                               | 11          | mir-128,-140,-146,-218,-27b,-34,-22,-133,-206,-15,-152           |
|                    |                                 | 'cell junction'                      | 0.00163 | 0.15601536                               | 11          | mir-128,-146,-218,-27b,-30b,-34,-22,-133,-206,-152,-9            |
|                    | sort by p-vals                  | 'binding'                            | 3.3E-06 | 0.0455292                                | 1           | mir-218                                                          |
|                    |                                 | 'cell'                               | 7.6E-06 | 0.04341264                               | 1           | mir-218                                                          |
|                    |                                 | 'phosphoprotein'                     | 2.2E-05 | 0.05780538                               | 1           | mir-128                                                          |
|                    |                                 | 'cell communication'                 | 2.9E-05 | 0.06087646                               | 3           | mir-128,-139,-138                                                |
|                    |                                 | 'localization'                       | 3E-05   | 0.08478973                               | 8           | mir-128,-140,-218,-23b,-101,-223,-15,-138                        |
|                    | sort by offset from non-targets | 'membrane trafficking'               | 0.003   | 0.35049498                               | 1           | mir-27b                                                          |
|                    |                                 | 'clathrin-coated vesicle'            | 0.00438 | 0.29631358                               | 2           | mir-27b,-133                                                     |
|                    |                                 | 'microtubule associated complex'     | 0.00385 | 0.26621456                               | 1           | mir-26                                                           |
|                    |                                 | 'cytoplasmic membrane-bound vesicle' | 0.0045  | 0.28686995                               | 3           | mir-23b,-34,-133                                                 |
|                    |                                 | 'coated vesicle'                     | 0.00438 | 0.29631358                               | 2           | mir-27b,-133                                                     |
| Coherent terms     | sort by multiplicity of miRs    | 'transport'                          | 0.00195 | 0.1022341                                | 6           | mir-122a,-153,-219,-33,-144,-106                                 |
|                    |                                 | 'establishment of localization'      | 0.00089 | 0.09291339                               | 6           | mir-122a,-153,-219,-33,-144,-106                                 |
|                    |                                 | 'cytoplasmic vesicle'                | 0.01047 | 0.11882022                               | 5           | mir-153,-19,-93,-130,-106                                        |
|                    |                                 | 'cell junction'                      | 0.01509 | 0.1605537                                | 5           | mir-122a,-153,-181,-19,-217                                      |
|                    |                                 | 'vesicle'                            | 0.01115 | 0.10509763                               | 4           | mir-153,-19,-93,-106                                             |
|                    | sort by p-vals                  | 'binding'                            | 1E-05   | 0.04122201                               | 1           | mir-106                                                          |
|                    |                                 | 'cell'                               | 5.5E-05 | 0.0421842                                | 1           | mir-106                                                          |
|                    |                                 | 'plasma membrane'                    | 2.6E-05 | 0.1128881                                | 1           | mir-153                                                          |
|                    |                                 | 'intracellular organelle'            | 0.00032 | 0.04619471                               | 1           | mir-106                                                          |
|                    |                                 | 'purine nucleotide binding'          | 0.00028 | 0.11273457                               | 1           | mir-219                                                          |
|                    | sort by offset from non-targets | 'exocytosis'                         | 0.00293 | 0.34902873                               | 1           | mir-153                                                          |
|                    |                                 | 'regulation of transport'            | 0.00312 | 0.33001786                               | 1           | mir-153                                                          |
|                    |                                 | 'secretory pathway'                  | 0.00102 | 0.294373                                 | 1           | mir-153                                                          |
|                    |                                 | 'cytoplasmic membrane-bound vesicle' | 0.00328 | 0.23523918                               | 1           | mir-153                                                          |
|                    |                                 | 'secretion'                          | 0.00021 | 0.25211073                               | 1           | mir-153                                                          |

---

---

mir-9

0

0

0

0

0

0

---

0

0

0

0

0

0

0

0

0

0

---

0

0

0

0

0

0

0

0

0

0

---

0

0

0

0

0

0

0

0

---

0

0

0

0

0

0

0

0

0

0

---

0

0

0

0

0

0

0

0

0

0

---
