# Supplementary material for: Tissue and Process Specific microRNA–mRNA Co-Expression in Mammalian Development and Malignancy
Source: PubMed Central journal article supplement (PMC2673043; doi:10.1371/journal.pone.0005436), 2009-05-05
Supplement: pone.0005436.s010.pdf [file pone.0005436.s010.pdf]

**Supple. Table 9: Significant GO terms in developing cerebellum comparing targets with non-target control set (picTar target prediction is used)**

|                    |                                 | Gene Ontological term                   | p        | off set value of logFC from control sets | # of miRNAs |                                                         |
|--------------------|---------------------------------|-----------------------------------------|----------|------------------------------------------|-------------|---------------------------------------------------------|
| Non-coherent terms | sort by multiplicity of miRs    | 'cell junction'                         | 0.006236 | 0.151849913                              | 11          | mir-125,-128,-137,-146,-218,-23b,-27b,-34,-22,-133,-206 |
|                    |                                 | 'synapse'                               | 0.006528 | 0.208185125                              | 8           | mir-128,-137,-146,-218,-27b,-34,-22,-206                |
|                    |                                 | 'transmission of nerve impulse'         | 0.000855 | 0.1603155                                | 7           | mir-128,-27b,-34,-133,-206,-152,-9                      |
|                    |                                 | 'synaptic transmission'                 | 0.00098  | 0.178864985                              | 7           | mir-128,-27b,-34,-133,-206,-152,-9                      |
|                    |                                 | 'cell projection'                       | 0.007125 | 0.13770687                               | 7           | mir-103,-128,-218,-101,-206,-15, let-7a                 |
|                    | sort by p-vals                  | 'binding'                               | 2.25E-05 | 0.042488943                              | 1           | mir-103                                                 |
|                    |                                 | 'cell'                                  | 2.4E-05  | 0.0437635                                | 1           | mir-103                                                 |
|                    |                                 | 'protein binding'                       | 2.78E-05 | 0.048050004                              | 2           | mir-103,-15                                             |
|                    |                                 | 'transport'                             | 6.31E-05 | 0.091034972                              | 4           | mir-103,-218,-101,-15                                   |
|                    |                                 | 'establishment of localization'         | 0.000176 | 0.075996489                              | 6           | mir-103,-128,-218,-101,-133,-15                         |
|                    | sort by offset from non-targets | 'ion channel activity'                  | 0.007935 | 0.314467125                              | 1           | mir-15                                                  |
|                    |                                 | 'SNARE binding'                         | 0.000791 | 0.311694225                              | 1           | mir-206                                                 |
|                    |                                 | 'neurotransmitter secretion'            | 0.00459  | 0.297756425                              | 4           | mir-128,-34,-133,-206                                   |
|                    |                                 | 'regulation of neurotransmitter levels' | 0.001633 | 0.285322648                              | 4           | mir-128,-34,-133,-206                                   |
|                    |                                 | 'clathrin-coated vesicle'               | 0.011711 | 0.27584591                               | 1           | mir-133                                                 |
| Coherent terms     | sort by multiplicity of miRs    | 'membrane'                              | 0.000366 | 0.06658696                               | 8           | mir-122,-19,-33,-93,-144,-130,-106,-184                 |
|                    |                                 | 'synaptic transmission'                 | 0.011475 | 0.108695394                              | 7           | mir-153,-30b,-93,-92,-130,-106,-7                       |
|                    |                                 | 'transport'                             | 0.00015  | 0.084563773                              | 6           | mir-153,-33,-144,-92,-130,-106                          |
|                    |                                 | 'transmission of nerve impulse'         | 0.00418  | 0.12694566                               | 5           | mir-153,-19,-93,-130,-106                               |
|                    |                                 | 'establishment of localization'         | 9.23E-05 | 0.082293521                              | 5           | mir-153,-33,-144,-92,-130                               |
|                    | sort by p-vals                  | 'establishment of localization'         | 9.23E-05 | 0.082293521                              | 5           | mir-153,-33,-144,-92,-130                               |
|                    |                                 | 'vesicle-mediated transport'            | 0.00012  | 0.146750035                              | 1           | mir-153                                                 |
|                    |                                 | 'transport'                             | 0.00015  | 0.084563773                              | 6           | mir-153,-33,-144,-92,-130,-106                          |
|                    |                                 | 'localization'                          | 0.000226 | 0.074940921                              | 4           | mir-153,-144,-92,-130                                   |
|                    |                                 | 'nervous system development'            | 0.000246 | 0.10007885                               | 1           | mir-144                                                 |
|                    | sort by offset from non-targets | 'disease mutation'                      | 0.03234  | 0.28356959                               | 1           | mir-216                                                 |
|                    |                                 | 'membrane trafficking'                  | 0.015462 | 0.301388125                              | 1           | mir-130                                                 |
|                    |                                 | 'SNARE binding'                         | 0.003974 | 0.303298915                              | 1           | mir-153                                                 |
|                    |                                 | 'regulation of transport'               | 0.005598 | 0.264741285                              | 1           | mir-153                                                 |
|                    |                                 | 'potassium ion binding'                 | 0.004451 | 0.249314015                              | 1           | mir-144                                                 |
