# Supplementary material for: Tissue and Process Specific microRNA–mRNA Co-Expression in Mammalian Development and Malignancy
Source: PubMed Central journal article supplement (PMC2673043; doi:10.1371/journal.pone.0005436), 2009-05-05
Supplement: pone.0005436.s011.pdf [file pone.0005436.s011.pdf]

|                                                |            |             |   |          |   |   |   |   |   |   |   |   |   |   |
|------------------------------------------------|------------|-------------|---|----------|---|---|---|---|---|---|---|---|---|---|
| 'regulation of neurotransmitter levels'        | 0.00134684 | -0.24048096 | 1 | mir-128  | 0 | 0 | 0 | 0 | 0 | 0 | 0 | 0 | 0 | 0 |
| 'membrane'                                     | 0.00582189 | -0.07041844 | 1 | mir-133  | 0 | 0 | 0 | 0 | 0 | 0 | 0 | 0 | 0 | 0 |
| 'multigene family'                             | 0.00411201 | -0.34378219 | 1 | mir-146  | 0 | 0 | 0 | 0 | 0 | 0 | 0 | 0 | 0 | 0 |
| 'exocytosis'                                   | 0.00096199 | -0.23542456 | 1 | mir-128  | 0 | 0 | 0 | 0 | 0 | 0 | 0 | 0 | 0 | 0 |
| 'negative regulation of physiological process' | 0.00684582 | -0.06897961 | 1 | mir-124a | 0 | 0 | 0 | 0 | 0 | 0 | 0 | 0 | 0 | 0 |
| 'ion transport'                                | 0.01356637 | -0.15587877 | 1 | mir-206  | 0 | 0 | 0 | 0 | 0 | 0 | 0 | 0 | 0 | 0 |
| 'secretory pathway'                            | 0.00096199 | -0.23542456 | 1 | mir-128  | 0 | 0 | 0 | 0 | 0 | 0 | 0 | 0 | 0 | 0 |
| 'monovalent inorganic cation transport'        | 0.02608799 | -0.18576565 | 1 | mir-206  | 0 | 0 | 0 | 0 | 0 | 0 | 0 | 0 | 0 | 0 |
| 'muscle contraction'                           | 0.01188359 | -0.15732593 | 1 | mir-30b  | 0 | 0 | 0 | 0 | 0 | 0 | 0 | 0 | 0 | 0 |

### Down regulated in Ptch+/- MB Early coherent

| GO terms                        | p-val<br>(average) of<br>coherent<br>targets vs.<br>non-miR<br>target gene<br>bkgd | LogFC Val<br>(average) of<br>coherent<br>targets vs.<br>non-miR<br>target gene<br>bkgd | # of<br>miRs | miRs       |          |          |   |   |   |   |   |   |   |   |
|---------------------------------|------------------------------------------------------------------------------------|----------------------------------------------------------------------------------------|--------------|------------|----------|----------|---|---|---|---|---|---|---|---|
| 'localization'                  | 0.00172503                                                                         | -0.09300527                                                                            | 3            | mir-153    | mir-33   | mir-92-1 | 0 | 0 | 0 | 0 | 0 | 0 | 0 | 0 |
| 'establishment of localization' | 0.00172503                                                                         | -0.09300527                                                                            | 3            | mir-153    | mir-33   | mir-92-1 | 0 | 0 | 0 | 0 | 0 | 0 | 0 | 0 |
| 'transmission of nerve impulse' | 0.0130364                                                                          | -0.15202731                                                                            | 2            | mir-153    | mir-19a  | 0        | 0 | 0 | 0 | 0 | 0 | 0 | 0 | 0 |
| 'synaptic transmission'         | 0.0130364                                                                          | -0.15202731                                                                            | 2            | mir-153    | mir-19a  | 0        | 0 | 0 | 0 | 0 | 0 | 0 | 0 | 0 |
| 'transport'                     | 0.0036384                                                                          | -0.09540009                                                                            | 2            | mir-33     | mir-92-1 | 0        | 0 | 0 | 0 | 0 | 0 | 0 | 0 | 0 |
| 'cell'                          | 0.00361105                                                                         | -0.04501405                                                                            | 2            | mir-153    | mir-92-1 | 0        | 0 | 0 | 0 | 0 | 0 | 0 | 0 | 0 |
| 'secretion'                     | 0.00757369                                                                         | -0.14844736                                                                            | 1            | mir-153    | 0        | 0        | 0 | 0 | 0 | 0 | 0 | 0 | 0 | 0 |
| 'cell-cell signaling'           | 0.0021271                                                                          | -0.14268852                                                                            | 1            | mir-153    | 0        | 0        | 0 | 0 | 0 | 0 | 0 | 0 | 0 | 0 |
| 'membrane fraction'             | 0.00394401                                                                         | -0.14684528                                                                            | 1            | mir-92-1,2 | 0        | 0        | 0 | 0 | 0 | 0 | 0 | 0 | 0 | 0 |
| 'ion transporter activity'      | 0.01442771                                                                         | -0.17552556                                                                            | 1            | mir-181a   | 0        | 0        | 0 | 0 | 0 | 0 | 0 | 0 | 0 | 0 |
| 'synapse'                       | 0.00636344                                                                         | -0.18120322                                                                            | 1            | mir-153    | 0        | 0        | 0 | 0 | 0 | 0 | 0 | 0 | 0 | 0 |
| 'lipoprotein'                   | 0.01366499                                                                         | -0.12741185                                                                            | 1            | mir-153    | 0        | 0        | 0 | 0 | 0 | 0 | 0 | 0 | 0 | 0 |
| 'ion transport'                 | 0.01442771                                                                         | -0.17552556                                                                            | 1            | mir-181a   | 0        | 0        | 0 | 0 | 0 | 0 | 0 | 0 | 0 | 0 |

### Up regulated in Ptch+/- MB Early non-coherent

| GO terms | p-val<br>(average) of<br>non-coherent<br>targets vs.<br>non-miR<br>target gene<br>bkgd | LogFC Val<br>(average) of<br>non-coherent<br>targets vs.<br>non-miR<br>target gene<br>bkgd | # of<br>miRs | miRs |
|----------|----------------------------------------------------------------------------------------|--------------------------------------------------------------------------------------------|--------------|------|
|----------|----------------------------------------------------------------------------------------|--------------------------------------------------------------------------------------------|--------------|------|



|                                                   |            |            |   |            |          |         |   |   |   |   |   |   |   |   |   |
|---------------------------------------------------|------------|------------|---|------------|----------|---------|---|---|---|---|---|---|---|---|---|
| 'regulation of cell proliferation'                | 0.01385384 | 1.37501312 | 3 | mir-139    | mir-124ε | mir-9   | 0 | 0 | 0 | 0 | 0 | 0 | 0 | 0 | 0 |
| 'transmembrane protein'                           | 0.00691429 | 2.56896458 | 3 | mir-23b    | mir-34a  | mir-223 | 0 | 0 | 0 | 0 | 0 | 0 | 0 | 0 | 0 |
| 'glycoprotein'                                    | 7.4385E-05 | 1.92983142 | 3 | mir-23b    | mir-34a  | let-7a  | 0 | 0 | 0 | 0 | 0 | 0 | 0 | 0 | 0 |
| 'direct protein sequencing'                       | 0.00939947 | 1.67104818 | 2 | let-7a     | mir-9    |         | 0 | 0 | 0 | 0 | 0 | 0 | 0 | 0 | 0 |
| 'purine nucleotide binding'                       | 0.01386792 | 1.43489503 | 2 | mir-128    | let-7a   |         | 0 | 0 | 0 | 0 | 0 | 0 | 0 | 0 | 0 |
| 'HSA01430:CELL COMMUNICATION'                     | 0.00183965 | 3.15917646 | 2 | let-7a     | mir-124ε |         | 0 | 0 | 0 | 0 | 0 | 0 | 0 | 0 | 0 |
| 'plasma membrane'                                 | 0.00471078 | 1.55833084 | 2 | mir-34a    | let-7a   |         | 0 | 0 | 0 | 0 | 0 | 0 | 0 | 0 | 0 |
| 'nucleotide-binding'                              | 0.01344244 | 1.53988864 | 2 | mir-128    | let-7a   |         | 0 | 0 | 0 | 0 | 0 | 0 | 0 | 0 | 0 |
| 'cell adhesion'                                   | 0.00960838 | 1.20133505 | 2 | mir-26a    | mir-124ε |         | 0 | 0 | 0 | 0 | 0 | 0 | 0 | 0 | 0 |
| 'transferase'                                     | 0.01470168 | 0.69432209 | 2 | mir-125a   | mir-128  |         | 0 | 0 | 0 | 0 | 0 | 0 | 0 | 0 | 0 |
| 'cytoplasm'                                       | 0.00842129 | 1.10646956 | 2 | mir-128    | let-7a   |         | 0 | 0 | 0 | 0 | 0 | 0 | 0 | 0 | 0 |
| 'transport'                                       | 0.00884536 | 0.4833216  | 2 | mir-92-1,2 | let-7a   |         | 0 | 0 | 0 | 0 | 0 | 0 | 0 | 0 | 0 |
| 'extracellular matrix structural constituent'     | 0.00214038 | 3.78303047 | 2 | mir-26a    | let-7a   |         | 0 | 0 | 0 | 0 | 0 | 0 | 0 | 0 | 0 |
| 'coiled coil'                                     | 0.02020721 | 1.07370575 | 2 | mir-103-1, | let-7a   |         | 0 | 0 | 0 | 0 | 0 | 0 | 0 | 0 | 0 |
| 'positive regulation of cellular process'         | 0.01200344 | 1.833014   | 2 | mir-128    | mir-96   |         | 0 | 0 | 0 | 0 | 0 | 0 | 0 | 0 | 0 |
| 'organ development'                               | 0.01059971 | 1.63377131 | 2 | mir-23b    | mir-9    |         | 0 | 0 | 0 | 0 | 0 | 0 | 0 | 0 | 0 |
| 'IPR013320:Concanavalin A-like lectin/glucan'     | 0.0175274  | 2.53916393 | 2 | mir-26a    | mir-124ε |         | 0 | 0 | 0 | 0 | 0 | 0 | 0 | 0 | 0 |
| 'duplication'                                     | 0.02264578 | 1.40597771 | 2 | mir-30b    | mir-124ε |         | 0 | 0 | 0 | 0 | 0 | 0 | 0 | 0 | 0 |
| 'transferase activity, transferring phosphorus-c' | 0.00622796 | 2.14875998 | 2 | mir-128    | mir-34a  |         | 0 | 0 | 0 | 0 | 0 | 0 | 0 | 0 | 0 |
| 'calcium binding'                                 | 0.03984811 | 1.64405962 | 2 | mir-23b    | mir-152  |         | 0 | 0 | 0 | 0 | 0 | 0 | 0 | 0 | 0 |
| 'cell organization and biogenesis'                | 0.02545904 | 0.19406755 | 2 | mir-34a    | mir-106  |         | 0 | 0 | 0 | 0 | 0 | 0 | 0 | 0 | 0 |
| 'calcium'                                         | 0.02967447 | 1.18967267 | 1 | mir-152    |          |         | 0 | 0 | 0 | 0 | 0 | 0 | 0 | 0 | 0 |
| 'atp-binding'                                     | 0.00539903 | 1.7119972  | 1 | mir-128    |          |         | 0 | 0 | 0 | 0 | 0 | 0 | 0 | 0 | 0 |
| 'IPR001245:Tyrosine protein kinase'               | 0.01157056 | 2.7164259  | 1 | mir-128    |          |         | 0 | 0 | 0 | 0 | 0 | 0 | 0 | 0 | 0 |
| 'IPR006209:EGF-like'                              | 0.01023773 | 2.32988007 | 1 | mir-23b    |          |         | 0 | 0 | 0 | 0 | 0 | 0 | 0 | 0 | 0 |
| 'hydroxylysine'                                   | 0.0012657  | 3.04731255 | 1 | let-7a     |          |         | 0 | 0 | 0 | 0 | 0 | 0 | 0 | 0 | 0 |
| 'developmental protein'                           | 0.00331987 | 2.25031695 | 1 | mir-23b    |          |         | 0 | 0 | 0 | 0 | 0 | 0 | 0 | 0 | 0 |
| 'hydroxyproline'                                  | 0.0012657  | 3.04731255 | 1 | let-7a     |          |         | 0 | 0 | 0 | 0 | 0 | 0 | 0 | 0 | 0 |

### Down regulated in Human MB cell line Late Non-coherent

| GO terms             | p-val<br>(average) of<br>non-coherent<br>targets vs.<br>non-miR-<br>target gene<br>bkgd | LogFC Val<br>(average) of<br>non-coherent<br>targets vs.<br>non-miR<br>target gene<br>bkgd | # of<br>miR<br>inciden<br>ces in<br>human<br>MB<br>cancer<br>cell line<br>miRs | mir-103-1, | mir-128 | mir-140 | mir-146 | mir-181ε | mir-218 | mir-34a | mir-143 | mir-145 | mir-133 | mir-206 |
|----------------------|-----------------------------------------------------------------------------------------|--------------------------------------------------------------------------------------------|--------------------------------------------------------------------------------|------------|---------|---------|---------|----------|---------|---------|---------|---------|---------|---------|
| 'cell communication' | 0.00293296                                                                              | -1.5267677                                                                                 | 15                                                                             | mir-103-1, | mir-128 | mir-140 | mir-146 | mir-181ε | mir-218 | mir-34a | mir-143 | mir-145 | mir-133 | mir-206 |

|                                    |            |             |    |            |          |          |         |          |         |         |         |         |         |         |   |
|------------------------------------|------------|-------------|----|------------|----------|----------|---------|----------|---------|---------|---------|---------|---------|---------|---|
| 'transmission of nerve impulse'    | 0.00614581 | -3.72827775 | 14 | mir-128    | mir-140  | mir-146  | mir-218 | mir-27b  | mir-30b | mir-143 | mir-133 | mir-206 | mir-15  | mir-152 |   |
| 'synaptic transmission'            | 0.00614581 | -3.72827775 | 14 | mir-128    | mir-140  | mir-146  | mir-218 | mir-27b  | mir-30b | mir-143 | mir-133 | mir-206 | mir-15  | mir-152 |   |
| 'transport'                        | 0.00870999 | -2.18766785 | 11 | mir-128    | mir-139  | mir-140  | mir-146 | mir-181ε | mir-218 | mir-34a | mir-133 | mir-15  | let-7a  | mir-138 |   |
| 'cell-cell signaling'              | 0.00620298 | -3.76080007 | 11 | mir-128    | mir-140  | mir-146  | mir-218 | mir-27b  | mir-143 | mir-133 | mir-206 | mir-182 | mir-15  | mir-138 |   |
| 'calcium ion binding'              | 0.01333406 | -1.66795127 | 11 | mir-103-1, | mir-128  | mir-19a  | mir-23b | mir-26a  | mir-30b | mir-133 | mir-182 | mir-15  | mir-152 | let-7a  |   |
| 'binding'                          | 0.00750254 | -0.84400892 | 10 | mir-103-1, | mir-139  | mir-146  | mir-204 | mir-26a  | mir-143 | mir-133 | mir-223 | mir-15  | mir-138 |         | 0 |
| 'cellular process'                 | 0.00886309 | -0.74450199 | 10 | mir-103-1, | mir-139  | mir-146  | mir-204 | mir-34a  | mir-145 | mir-133 | mir-223 | mir-15  | mir-138 |         | 0 |
| 'localization'                     | 0.00652681 | -1.6818742  | 9  | mir-128    | mir-139  | mir-146  | mir-218 | mir-34a  | mir-133 | mir-182 | let-7a  | mir-138 |         | 0       | 0 |
| 'multigene family'                 | 0.00482051 | -1.98743317 | 9  | mir-103-1, | mir-146  | mir-218  | mir-27b | mir-145  | mir-133 | mir-182 | mir-15  | mir-138 |         | 0       | 0 |
| 'establishment of localization'    | 0.00652681 | -1.6818742  | 9  | mir-128    | mir-139  | mir-146  | mir-218 | mir-34a  | mir-133 | mir-182 | let-7a  | mir-138 |         | 0       | 0 |
| 'protein binding'                  | 0.01602054 | -0.87251591 | 9  | mir-103-1, | mir-139  | mir-26a  | mir-143 | mir-145  | mir-133 | mir-223 | mir-15  | mir-138 |         | 0       | 0 |
| 'membrane'                         | 0.01058195 | -1.73581663 | 8  | mir-103-1, | mir-137  | mir-140  | mir-146 | mir-181ε | mir-218 | mir-206 | mir-15  |         | 0       | 0       | 0 |
| 'transmembrane'                    | 0.01601524 | -1.82105656 | 8  | mir-103-1, | mir-137  | mir-140  | mir-146 | mir-218  | mir-206 | mir-15  | mir-138 |         | 0       | 0       | 0 |
| 'synapse'                          | 0.00760714 | -4.05994793 | 7  | mir-137    | mir-146  | mir-181ε | mir-34a | mir-206  | mir-15  | mir-152 |         | 0       | 0       | 0       | 0 |
| 'cell'                             | 0.00733566 | -0.82209638 | 7  | mir-103-1, | mir-146  | mir-181ε | mir-34a | mir-223  | mir-15  | mir-138 |         | 0       | 0       | 0       | 0 |
| 'calcium'                          | 0.01297821 | -2.2912011  | 6  | mir-128    | mir-26a  | mir-133  | mir-15  | mir-152  | let-7a  |         | 0       | 0       | 0       | 0       | 0 |
| 'signal transduction'              | 0.01449878 | -1.16312001 | 6  | mir-103-1, | mir-181ε | mir-143  | mir-15  | mir-152  | mir-138 |         | 0       | 0       | 0       | 0       | 0 |
| 'system development'               | 0.01750693 | -2.86665653 | 6  | mir-204    | mir-133  | mir-206  | mir-15  | mir-106  | mir-138 |         | 0       | 0       | 0       | 0       | 0 |
| 'cellular physiological process'   | 0.00606685 | -0.84661847 | 6  | mir-103-1, | mir-139  | mir-146  | mir-223 | mir-15   | mir-138 |         | 0       | 0       | 0       | 0       | 0 |
| 'physiological process'            | 0.00280223 | -0.86373828 | 6  | mir-103-1, | mir-139  | mir-146  | mir-223 | mir-15   | mir-138 |         | 0       | 0       | 0       | 0       | 0 |
| 'nervous system development'       | 0.01750693 | -2.86665653 | 6  | mir-204    | mir-133  | mir-206  | mir-15  | mir-106  | mir-138 |         | 0       | 0       | 0       | 0       | 0 |
| 'glycoprotein'                     | 0.01012203 | -2.00429264 | 6  | mir-218    | mir-221  | mir-133  | mir-206 | mir-15   | mir-138 |         | 0       | 0       | 0       | 0       | 0 |
| 'alternative splicing'             | 0.01380315 | -0.92394519 | 6  | mir-103-1, | mir-139  | mir-146  | mir-218 | mir-15   | mir-138 |         | 0       | 0       | 0       | 0       | 0 |
| 'cation transporter activity'      | 0.01653032 | -2.92655552 | 5  | mir-218    | mir-30b  | mir-182  | mir-15  | let-7a   |         | 0       | 0       | 0       | 0       | 0       | 0 |
| 'metal ion-binding site:Calcium 2' | 0.00413625 | -5.83548523 | 5  | mir-128    | mir-34a  | mir-152  | let-7a  | mir-9    |         | 0       | 0       | 0       | 0       | 0       | 0 |
| 'metal ion-binding site:Calcium 1' | 0.00413625 | -5.83548523 | 5  | mir-128    | mir-34a  | mir-152  | let-7a  | mir-9    |         | 0       | 0       | 0       | 0       | 0       | 0 |
| 'transporter activity'             | 0.01979358 | -2.2709792  | 5  | mir-137    | mir-146  | mir-218  | mir-34a | let-7a   |         | 0       | 0       | 0       | 0       | 0       | 0 |
| 'splice variant'                   | 0.01336658 | -1.04873221 | 5  | mir-103-1, | mir-139  | mir-146  | mir-15  | mir-138  |         | 0       | 0       | 0       | 0       | 0       | 0 |
| 'ion binding'                      | 0.00428612 | -1.24633567 | 4  | mir-30b    | mir-34a  | mir-15   | let-7a  |          | 0       | 0       | 0       | 0       | 0       | 0       | 0 |
| 'cation binding'                   | 0.00312794 | -1.31579403 | 4  | mir-30b    | mir-34a  | mir-15   | let-7a  |          | 0       | 0       | 0       | 0       | 0       | 0       | 0 |
| 'metal ion binding'                | 0.00428612 | -1.24633567 | 4  | mir-30b    | mir-34a  | mir-15   | let-7a  |          | 0       | 0       | 0       | 0       | 0       | 0       | 0 |
| 'nucleotide binding'               | 0.02013924 | -1.1819519  | 4  | mir-103-1, | mir-139  | mir-218  | mir-375 |          | 0       | 0       | 0       | 0       | 0       | 0       | 0 |
| 'cytoplasm'                        | 0.01415696 | -1.39782094 | 4  | mir-34a    | mir-15   | let-7a   | mir-138 |          | 0       | 0       | 0       | 0       | 0       | 0       | 0 |
| 'coiled coil'                      | 0.0099176  | -2.18133038 | 4  | mir-103-1, | mir-146  | mir-206  | mir-138 |          | 0       | 0       | 0       | 0       | 0       | 0       | 0 |
| 'cytoskeleton'                     | 0.02346268 | -1.65140412 | 4  | mir-26a    | mir-34a  | mir-152  | mir-9   |          | 0       | 0       | 0       | 0       | 0       | 0       | 0 |
| 'phosphorylation'                  | 0.01514142 | -1.09196186 | 4  | mir-103-1, | mir-218  | mir-26a  | mir-138 |          | 0       | 0       | 0       | 0       | 0       | 0       | 0 |
| 'lipoprotein'                      | 0.00558109 | -2.98393695 | 4  | mir-103-1, | mir-128  | mir-206  | mir-152 |          | 0       | 0       | 0       | 0       | 0       | 0       | 0 |

|                                                 |            |             |   |                    |                  |   |   |   |   |   |   |   |   |
|-------------------------------------------------|------------|-------------|---|--------------------|------------------|---|---|---|---|---|---|---|---|
| 'Unknown'                                       | 0.00169932 | -1.53197267 | 3 | mir-103-1, mir-218 | mir-138          | 0 | 0 | 0 | 0 | 0 | 0 | 0 | 0 |
| 'hydrolase activity, acting on ester bonds'     | 0.02644898 | -0.99754197 | 3 | mir-103-1, mir-145 | mir-15           | 0 | 0 | 0 | 0 | 0 | 0 | 0 | 0 |
| 'secretion'                                     | 0.00480475 | -4.37534893 | 3 | mir-128            | mir-137 mir-34a  | 0 | 0 | 0 | 0 | 0 | 0 | 0 | 0 |
| 'hydrolase'                                     | 0.02075074 | -1.31607287 | 3 | mir-145            | mir-15 let-7a    | 0 | 0 | 0 | 0 | 0 | 0 | 0 | 0 |
| 'plasma membrane'                               | 0.02157529 | -1.3054216  | 3 | mir-204            | mir-143 mir-182  | 0 | 0 | 0 | 0 | 0 | 0 | 0 | 0 |
| 'phosphoprotein'                                | 0.02183061 | -1.86550183 | 3 | mir-128            | mir-194 mir-124c | 0 | 0 | 0 | 0 | 0 | 0 | 0 | 0 |
| 'signal'                                        | 0.01463852 | -2.7353827  | 3 | mir-139            | mir-221 mir-15   | 0 | 0 | 0 | 0 | 0 | 0 | 0 | 0 |
| 'metal ion-binding site:Calcium 1 (via carbonyl | 0.00383489 | -6.01343303 | 3 | mir-128            | mir-34a mir-9    | 0 | 0 | 0 | 0 | 0 | 0 | 0 | 0 |
| 'domain:Protein kinase'                         | 0.01400438 | -1.43854382 | 3 | mir-218            | mir-182 mir-124c | 0 | 0 | 0 | 0 | 0 | 0 | 0 | 0 |
| 'intracellular'                                 | 0.006147   | -0.68184795 | 3 | mir-103-1, mir-146 | mir-15           | 0 | 0 | 0 | 0 | 0 | 0 | 0 | 0 |
| 'vesicle-mediated transport'                    | 0.00576745 | -2.98261568 | 3 | mir-103-1, mir-128 | mir-34a          | 0 | 0 | 0 | 0 | 0 | 0 | 0 | 0 |
| 'transmembrane protein'                         | 0.02388183 | -1.93987693 | 3 | mir-218            | mir-34a mir-133  | 0 | 0 | 0 | 0 | 0 | 0 | 0 | 0 |

### Down regulated in Human MB cell line Early coherent

| GO terms                        | p-val<br>(average) of<br>coherent<br>targets vs.<br>non-miR-<br>target gene<br>bkgd | LogFC Val<br>(average) of<br>coherent<br>targets vs.<br>non-miR-<br>target gene<br>bkgd | # of<br>miR<br>inciden<br>ces in<br>human<br>MB<br>cancer<br>cell line<br>miRs |          |                   |          |         |   |   |   |   |   |   |
|---------------------------------|-------------------------------------------------------------------------------------|-----------------------------------------------------------------------------------------|--------------------------------------------------------------------------------|----------|-------------------|----------|---------|---|---|---|---|---|---|
| 'binding'                       | 0.01549341                                                                          | -0.53569936                                                                             | 5                                                                              | mir-30b  | mir-33 mir-93     | mir-92-1 | mir-106 | 0 | 0 | 0 | 0 | 0 | 0 |
| 'multigene family'              | 0.00499959                                                                          | -2.00381773                                                                             | 5                                                                              | mir-153  | mir-181e mir-19a  | mir-92-1 | mir-106 | 0 | 0 | 0 | 0 | 0 | 0 |
| 'calcium ion binding'           | 0.01303695                                                                          | -2.7680117                                                                              | 5                                                                              | mir-181a | mir-19a mir-93    | mir-92-1 | mir-130 | 0 | 0 | 0 | 0 | 0 | 0 |
| 'ion binding'                   | 0.01243451                                                                          | -1.47806644                                                                             | 4                                                                              | mir-217  | mir-33 mir-93     | mir-92-1 |         | 0 | 0 | 0 | 0 | 0 | 0 |
| 'calcium'                       | 0.01552967                                                                          | -2.33853525                                                                             | 4                                                                              | mir-181a | mir-19a mir-93    | mir-130  |         | 0 | 0 | 0 | 0 | 0 | 0 |
| 'metal ion binding'             | 0.01243451                                                                          | -1.47806644                                                                             | 4                                                                              | mir-217  | mir-33 mir-93     | mir-92-1 |         | 0 | 0 | 0 | 0 | 0 | 0 |
| 'ion transporter activity'      | 0.01262056                                                                          | -3.69570842                                                                             | 4                                                                              | mir-181a | mir-93            | mir-92-1 | mir-106 | 0 | 0 | 0 | 0 | 0 | 0 |
| 'cellular process'              | 0.00567631                                                                          | -0.59981944                                                                             | 4                                                                              | mir-30b  | mir-93            | mir-92-1 | mir-106 | 0 | 0 | 0 | 0 | 0 | 0 |
| 'cation binding'                | 0.00765852                                                                          | -1.67434455                                                                             | 3                                                                              | mir-217  | mir-93            | mir-92-1 |         | 0 | 0 | 0 | 0 | 0 | 0 |
| 'transmission of nerve impulse' | 0.01046244                                                                          | -3.49209867                                                                             | 3                                                                              | mir-153  | mir-19a           | mir-106  |         | 0 | 0 | 0 | 0 | 0 | 0 |
| 'cation transporter activity'   | 0.01693966                                                                          | -3.7219623                                                                              | 3                                                                              | mir-93   | mir-92-1          | mir-106  |         | 0 | 0 | 0 | 0 | 0 | 0 |
| 'synaptic transmission'         | 0.01046244                                                                          | -3.49209867                                                                             | 3                                                                              | mir-153  | mir-19a           | mir-106  |         | 0 | 0 | 0 | 0 | 0 | 0 |
| 'cell communication'            | 0.01537778                                                                          | -0.74981708                                                                             | 3                                                                              | mir-181a | mir-19a mir-33    |          |         | 0 | 0 | 0 | 0 | 0 | 0 |
| 'cell-cell signaling'           | 0.01046244                                                                          | -3.49209867                                                                             | 3                                                                              | mir-153  | mir-19a           | mir-106  |         | 0 | 0 | 0 | 0 | 0 | 0 |
| 'membrane'                      | 0.01156224                                                                          | -1.5990482                                                                              | 3                                                                              | mir-122a | mir-181e mir-92-1 |          |         | 0 | 0 | 0 | 0 | 0 | 0 |
| 'physiological process'         | 0.01333945                                                                          | -0.64024066                                                                             | 3                                                                              | mir-93   | mir-92-1          | mir-106  |         | 0 | 0 | 0 | 0 | 0 | 0 |
| 'development'                   | 0.00308439                                                                          | -1.98422665                                                                             | 2                                                                              | mir-145  | mir-92-1          |          |         | 0 | 0 | 0 | 0 | 0 | 0 |

|                                                 |            |             |   |            |          |   |   |   |   |   |   |   |   |   |
|-------------------------------------------------|------------|-------------|---|------------|----------|---|---|---|---|---|---|---|---|---|
| 'metal ion transport'                           | 0.00890136 | -4.57997693 | 2 | mir-93     | mir-106  | 0 | 0 | 0 | 0 | 0 | 0 | 0 | 0 | 0 |
| 'plasma membrane'                               | 0.00929883 | -1.74004929 | 2 | mir-181a   | mir-92-1 | 0 | 0 | 0 | 0 | 0 | 0 | 0 | 0 | 0 |
| 'signal transducer activity'                    | 0.01096731 | -1.12819614 | 2 | mir-181a   | mir-19a  | 0 | 0 | 0 | 0 | 0 | 0 | 0 | 0 | 0 |
| 'hydrolase activity, acting on acid anhydrides, | 0.01673599 | -3.22686842 | 2 | mir-181a   | mir-106  | 0 | 0 | 0 | 0 | 0 | 0 | 0 | 0 | 0 |
| 'phosphoprotein'                                | 0.01167052 | -1.7565378  | 2 | mir-153    | mir-92-1 | 0 | 0 | 0 | 0 | 0 | 0 | 0 | 0 | 0 |
| 'transmembrane'                                 | 0.02284947 | -2.14994852 | 2 | mir-122a   | mir-92-1 | 0 | 0 | 0 | 0 | 0 | 0 | 0 | 0 | 0 |
| 'pyrophosphatase activity'                      | 0.01673599 | -3.22686842 | 2 | mir-181a   | mir-106  | 0 | 0 | 0 | 0 | 0 | 0 | 0 | 0 | 0 |
| 'cellular physiological process'                | 0.0085857  | -0.56741536 | 2 | mir-92-1,2 | mir-106  | 0 | 0 | 0 | 0 | 0 | 0 | 0 | 0 | 0 |
| 'hydrolase activity, acting on acid anhydrides' | 0.01673599 | -3.22686842 | 2 | mir-181a   | mir-106  | 0 | 0 | 0 | 0 | 0 | 0 | 0 | 0 | 0 |
| 'ion transport'                                 | 0.00635712 | -4.3330075  | 2 | mir-181a   | mir-93   | 0 | 0 | 0 | 0 | 0 | 0 | 0 | 0 | 0 |
| 'glycoprotein'                                  | 0.01397304 | -2.58345356 | 2 | mir-217    | mir-92-1 | 0 | 0 | 0 | 0 | 0 | 0 | 0 | 0 | 0 |
| 'nucleoside-triphosphatase activity'            | 0.01673599 | -3.22686842 | 2 | mir-181a   | mir-106  | 0 | 0 | 0 | 0 | 0 | 0 | 0 | 0 | 0 |
| 'atp-binding'                                   | 0.01716366 | -1.19134701 | 1 | mir-181a   | 0        | 0 | 0 | 0 | 0 | 0 | 0 | 0 | 0 | 0 |
| 'direct protein sequencing'                     | 0.0219303  | -2.37008343 | 1 | mir-92-1,2 | 0        | 0 | 0 | 0 | 0 | 0 | 0 | 0 | 0 | 0 |
| 'protein metabolism'                            | 0.02048454 | -2.00288347 | 1 | mir-122a   | 0        | 0 | 0 | 0 | 0 | 0 | 0 | 0 | 0 | 0 |
| 'HSA04020:CALCIUM SIGNALING PATHWA'             | 0.02538249 | -2.73240097 | 1 | mir-106    | 0        | 0 | 0 | 0 | 0 | 0 | 0 | 0 | 0 | 0 |
| 'purine nucleotide binding'                     | 0.0183162  | -1.00504124 | 1 | mir-181a   | 0        | 0 | 0 | 0 | 0 | 0 | 0 | 0 | 0 | 0 |
| 'metal ion-binding site:Magnesium'              | 0.00589974 | -5.60311987 | 1 | mir-106    | 0        | 0 | 0 | 0 | 0 | 0 | 0 | 0 | 0 | 0 |
| 'secretion'                                     | 0.00371753 | -2.65050247 | 1 | mir-153    | 0        | 0 | 0 | 0 | 0 | 0 | 0 | 0 | 0 | 0 |
| 'hydrolase'                                     | 0.02045386 | -1.68179323 | 1 | mir-106    | 0        | 0 | 0 | 0 | 0 | 0 | 0 | 0 | 0 | 0 |
| 'nucleotide-binding'                            | 0.0183162  | -1.00504124 | 1 | mir-181a   | 0        | 0 | 0 | 0 | 0 | 0 | 0 | 0 | 0 | 0 |
| 'catalytic activity'                            | 0.00174878 | -1.02454625 | 1 | mir-181a   | 0        | 0 | 0 | 0 | 0 | 0 | 0 | 0 | 0 | 0 |
| 'metabolism'                                    | 0.03445593 | -0.49339676 | 1 | mir-106    | 0        | 0 | 0 | 0 | 0 | 0 | 0 | 0 | 0 | 0 |
| 'domain:SH3'                                    | 0.02779036 | -2.0247861  | 1 | mir-27b    | 0        | 0 | 0 | 0 | 0 | 0 | 0 | 0 | 0 | 0 |
| 'cell differentiation'                          | 0.00894551 | -3.74351373 | 1 | mir-145    | 0        | 0 | 0 | 0 | 0 | 0 | 0 | 0 | 0 | 0 |
| 'regulation of cellular process'                | 0.01722927 | -0.97263601 | 1 | mir-30b    | 0        | 0 | 0 | 0 | 0 | 0 | 0 | 0 | 0 | 0 |
| 'morphogenesis'                                 | 0.01904593 | -1.92882805 | 1 | mir-145    | 0        | 0 | 0 | 0 | 0 | 0 | 0 | 0 | 0 | 0 |
| 'cellular protein metabolism'                   | 0.0241513  | -0.66407273 | 1 | mir-181a   | 0        | 0 | 0 | 0 | 0 | 0 | 0 | 0 | 0 | 0 |
| 'phosphate metabolism'                          | 0.01869532 | -0.69897807 | 1 | mir-181a   | 0        | 0 | 0 | 0 | 0 | 0 | 0 | 0 | 0 | 0 |
| 'sh3 domain'                                    | 0.02779036 | -2.0247861  | 1 | mir-27b    | 0        | 0 | 0 | 0 | 0 | 0 | 0 | 0 | 0 | 0 |
| 'heterodimer'                                   | 0.02443352 | -3.76774383 | 1 | mir-106    | 0        | 0 | 0 | 0 | 0 | 0 | 0 | 0 | 0 | 0 |
| 'disease mutation'                              | 0.02094698 | -3.1192207  | 1 | mir-137    | 0        | 0 | 0 | 0 | 0 | 0 | 0 | 0 | 0 | 0 |
| 'adenyl nucleotide binding'                     | 0.01716366 | -1.19134701 | 1 | mir-181a   | 0        | 0 | 0 | 0 | 0 | 0 | 0 | 0 | 0 | 0 |

Up regulated in Human MB cell line Early non-coherent
