# Supplementary material for: Tissue and Process Specific microRNA–mRNA Co-Expression in Mammalian Development and Malignancy
Source: PubMed Central journal article supplement (PMC2673043; doi:10.1371/journal.pone.0005436), 2009-05-05
Supplement: pone.0005436.s012.pdf [file pone.0005436.s012.pdf]

**Supple. Table 11: The statistic significance and other quantifications of the shared miRNA non-coherent GO terms between brain tumor and development. (picTar target prediction is used)**

| Term                            | LogFC Val     |                | # of miRNAs in Dev. | LogFC Val   |              | # of miRNAs in MB | # of common genes | Significant miRNAs shared btw Ptch+/- MB and development |         |         |         |         |       |  |
|---------------------------------|---------------|----------------|---------------------|-------------|--------------|-------------------|-------------------|----------------------------------------------------------|---------|---------|---------|---------|-------|--|
|                                 | p-val in Dev. | offset in Dev. |                     | p-val in MB | offset in MB |                   |                   | mir-128                                                  | mir-27b | mir-133 | mir-206 | mir-9   |       |  |
| 'transmission of nerve impulse' | 0.00085509    | 0.1603155      | 7                   | 0.00179757  | -0.19021323  | 7                 | 20                | mir-128                                                  | mir-27b | mir-133 | mir-206 | mir-9   |       |  |
| 'synaptic transmission'         | 0.00097989    | 0.17886499     | 7                   | 0.0013259   | -0.19562017  | 8                 | 19                | mir-128                                                  | mir-27b | mir-133 | mir-206 | mir-152 | mir-9 |  |
| 'cell communication'            | 0.00189153    | 0.07519943     | 2                   | 0.0006943   | -0.09264798  | 3                 | 18                | mir-133                                                  | 0       | 0       | 0       | 0       |       |  |
| 'transport'                     | 6.3099E-05    | 0.09103497     | 4                   | 0.00346232  | -0.08830199  | 8                 | 34                | mir-103                                                  | mir-218 | mir-15  | 0       | 0       |       |  |
| 'cell-cell signaling'           | 0.00179412    | 0.12451218     | 5                   | 0.00084774  | -0.16230764  | 7                 | 20                | mir-128                                                  | mir-133 | mir-9   | 0       | 0       |       |  |
| 'localization'                  | 0.00019289    | 0.06779094     | 6                   | 0.00238273  | -0.07947852  | 8                 | 76                | mir-103                                                  | mir-128 | mir-133 | mir-15  | 0       |       |  |
| 'establishment of localization' | 0.00017647    | 0.07599649     | 6                   | 0.00355532  | -0.08484031  | 9                 | 80                | mir-103                                                  | mir-128 | mir-218 | mir-133 | mir-15  |       |  |
| 'exocytosis'                    | 0.00684165    | 0.2421659      | 4                   | 0.00396211  | -0.21921647  | 3                 | 6                 | mir-128                                                  | mir-34  | mir-206 | 0       | 0       |       |  |
| 'vesicle-mediated transport'    | 0.00586559    | -0.06710742    | 1                   | 0.00586559  | -0.06710742  | 1                 | 13                | mir-103                                                  | 0       | 0       | 0       | 0       |       |  |
