# Supplementary material for: Tissue and Process Specific microRNA–mRNA Co-Expression in Mammalian Development and Malignancy
Source: PLoS One. 2009 May 5;4(5):e5436. doi: 10.1371/journal.pone.0005436 (PMC2673043; doi:10.1371/journal.pone.0005436)
Supplement: Table S16 — Common Enriched GO terms in developing Cerebellum and Lung (picTar prediction is used). (0.02 MB XLS) [file pone.0005436.s017.xls]

## Sheet: Table S16
Supple. Table 16: Common Enriched GO terms in developing Cerebellum and Lung (picTar prediction is used)
Late Non-coherent
GO terms	Term ID	p-val of non-coherent targets vs non-miR target gene bkgd in developing cerebellum	LogFC Val (average) of non-coherent targets minus non-miR target gene bkgd	miR in cereb Dev.	Term ID	p-val of non-coherent targets vs. non-miR-target gene bkgd in developing lung	LogFC Val of non-coherent targets minus non-miR target gene bkgd	miR in lung Dev.
'metal ion transport'	253	0.0100464	0.13985	miR-15	253	0.0333139	0.392249	miR-15
'MAPKKK cascade'	988	0.0220843	0.0704076	miR-15	988	0.033966	0.63804	miR-15
Early Non-coherent
None
Late Coherent
None
Early Coherent
GO terms	Term ID	p-val of non-coherent targets vs non-miR target gene bkgd in developing cerebellum	LogFC Val (average) of non-coherent targets minus non-miR target gene bkgd	miR in cereb Dev.	Term ID	p-val of non-coherent targets vs. non-miR-target gene bkgd in developing lung	LogFC Val of non-coherent targets minus non-miR target gene bkgd	miR in lung Dev.
'phosphorylation'	1425	0.0231956	0.38663	miR-181	1425	0.0265906	0.0313144	miR-181
