# Supplementary material for: Tissue and Process Specific microRNA–mRNA Co-Expression in Mammalian Development and Malignancy
Source: PLoS One. 2009 May 5;4(5):e5436. doi: 10.1371/journal.pone.0005436 (PMC2673043; doi:10.1371/journal.pone.0005436)
Supplement: Table S24 — Enriched processes of non-coherent genes of miRNA targets common in cerebellum development and Medulloblastoma (picTar prediction is used). (0.03 MB XLS) [file pone.0005436.s025.xls]

## Sheet: Table S24
Supple Table 24 The enriched processes of non-coherent genes of miRNA targets common in cerebellum development and Medulloblastoma (picTar prediction is used)
Synaptic Transmission Genes
ENTREZ_GENE_ID	Gene Name	Corr.of two series of dev.	GENE_SYMBOL	CYTOBAND
1742	DISCS, LARGE HOMOLOG 4 (DROSOPHILA)	0.915802	DLG4,	17p13.1,
1837	DYSTROBREVIN, ALPHA	0.954276	DTNA,	18q12,
1906	ENDOTHELIN 1	0.480636	EDN1,	6p24.1,
2571	GLUTAMATE DECARBOXYLASE 1 (BRAIN, 67KDA)	0.827121	GAD1,	2q31,
2572	GLUTAMATE DECARBOXYLASE 2 (PANCREATIC ISLETS AND BRAIN, 65KDA)	0.861384	Gad2,	10p11.23,
3751	POTASSIUM VOLTAGE-GATED CHANNEL, SHAL-RELATED SUBFAMILY, MEMBER 2	0.84677	KCND2,	7q31,
3778	POTASSIUM LARGE CONDUCTANCE CALCIUM-ACTIVATED CHANNEL, SUBFAMILY M, ALPHA MEMBER 1	0.962372	KCNMA1,	10q22.3,
4884	NEURONAL PENTRAXIN I	0.955618	NPTX1,	17q25.1-q25.2,
4929	NUCLEAR RECEPTOR SUBFAMILY 4, GROUP A, MEMBER 2	0.829172	NR4A2,	2q22-q23,
5376	PERIPHERAL MYELIN PROTEIN 22	0.908145	pmp22,	17p12-p11.2,
6506	SOLUTE CARRIER FAMILY 1 (GLIAL HIGH AFFINITY GLUTAMATE TRANSPORTER), MEMBER 2	0.670769	Slc1a2,	11p13-p12,
6529	SOLUTE CARRIER FAMILY 6 (NEUROTRANSMITTER TRANSPORTER, GABA), MEMBER 1	0.946978	SLC6A1,	3p25-p24,
6616	SYNAPTOSOMAL-ASSOCIATED PROTEIN, 25KDA	0.984316	Snap25,	20p12-p11.2,
6804	SYNTAXIN 1A (BRAIN)	0.320639	Stx1a,	7q11.23,
6844	VESICLE-ASSOCIATED MEMBRANE PROTEIN 2 (SYNAPTOBREVIN 2)	0.853874	Vamp2,	17p13.1,
6857	SYNAPTOTAGMIN I	0.835019	SYT1,	12cen-q21,
6860	SYNAPTOTAGMIN IV	0.663334	Syt4,	18q12.3,
23710	GABA(A) RECEPTOR-ASSOCIATED PROTEIN LIKE 1	0.831016	Gabarapl1,	12p13.2,
27020	NEUROPLASTIN	0.878623	NPTN,	15q22,
Exocytosis Genes
ENTREZ_GENE_ID	Gene Name	Corr.of two series of dev.	GENE_SYMBOL	CYTOBAND
286	ANKYRIN 1, ERYTHROCYTIC	0.986183	ANK1,	8p11.1,
6616	SYNAPTOSOMAL-ASSOCIATED PROTEIN, 25KDA	0.984316	Snap25,	20p12-p11.2,
6844	VESICLE-ASSOCIATED MEMBRANE PROTEIN 2 (SYNAPTOBREVIN 2)	0.853874	Vamp2,	17p13.1,
6857	SYNAPTOTAGMIN I	0.835019	SYT1,	12cen-q21,
6860	SYNAPTOTAGMIN IV	0.663334	Syt4,	18q12.3,
10565	ADP-RIBOSYLATION FACTOR GUANINE NUCLEOTIDE-EXCHANGE FACTOR 1(BREFELDIN A-INHIBITED)	0.278295	ARFGEF1,	8q13,
All 109 genes in the commonly shared two GO term trees between cerebellum dev and MB
ENTREZ_GENE_ID	Gene Name	Corr.of two series of dev.	GENE_SYMBOL	CYTOBAND
20	ATP-BINDING CASSETTE, SUB-FAMILY A (ABC1), MEMBER 2	0.907155	ABCA2,	9q34,
21	ATP-BINDING CASSETTE, SUB-FAMILY A (ABC1), MEMBER 3	0.678615	Abca3,	16p13.3,
90	ACTIVIN A RECEPTOR, TYPE I	0.696749	ACVR1,	2q23-q24,
91	ACTIVIN A RECEPTOR, TYPE IB	0.120148	Acvr1b,	12q13,
136	ADENOSINE A2B RECEPTOR	0.298698	ADORA2B,	17p12-p11.2,
286	ANKYRIN 1, ERYTHROCYTIC	0.986183	ANK1,	8p11.1,
351	AMYLOID BETA (A4) PRECURSOR PROTEIN (PEPTIDASE NEXIN-II, ALZHEIMER DISEASE)	0.84718	APP,	21q21.2,
402	ADP-RIBOSYLATION FACTOR-LIKE 2	0.511236	SNX15,	11q12, 11q13,
473	ARGININE-GLUTAMIC ACID DIPEPTIDE (RE) REPEATS	0.717694	Rere,	1p36.2-p36.1,
481	ATPASE, NA+/K+ TRANSPORTING, BETA 1 POLYPEPTIDE	0.720173	ATP1B1,	1q24,
491	ATPASE, CA++ TRANSPORTING, PLASMA MEMBRANE 2	0.887282	Atp2b2,	3p25.3,
575	BRAIN-SPECIFIC ANGIOGENESIS INHIBITOR 1	0.921438	Bai1,	8q24,
598	BCL2-LIKE 1	0.355432	Bcl2l1,	20q11.21,
830	CAPPING PROTEIN (ACTIN FILAMENT) MUSCLE Z-LINE, ALPHA 2	0.62659	CAPZA2,	7q31.2-q31.3,
1182	CHLORIDE CHANNEL 3	0.811213	clcn3,	4q33,
1213	CLATHRIN, HEAVY POLYPEPTIDE (HC)	0.784325	CLTC,	17q11-qter,
1399	V-CRK SARCOMA VIRUS CT10 ONCOGENE HOMOLOG (AVIAN)-LIKE	0.873541	CRKL,	22q11,
1742	DISCS, LARGE HOMOLOG 4 (DROSOPHILA)	0.915802	DLG4,	17p13.1,
1837	DYSTROBREVIN, ALPHA	0.954276	DTNA,	18q12,
1839	HEPARIN-BINDING EGF-LIKE GROWTH FACTOR	0.83133	HBEGF,	5q23,
1906	ENDOTHELIN 1	0.480636	EDN1,	6p24.1,
1942	EPHRIN-A1	0.768293	EFNA1,	1q21-q22,
2257	FIBROBLAST GROWTH FACTOR 12	0.845209	FGF12,	3q28,
2260	FIBROBLAST GROWTH FACTOR RECEPTOR 1 (FMS-RELATED TYROSINE KINASE 2, PFEIFFER SYNDROME)	0.871876	fgfr1,	8p11.2-p11.1,
2554	GAMMA-AMINOBUTYRIC ACID (GABA) A RECEPTOR, ALPHA 1	0.982131	Gabra1,	5q34-q35,
2562	GAMMA-AMINOBUTYRIC ACID (GABA) A RECEPTOR, BETA 3	0.822396	GABRB3,	15q11.2-q12,
2566	GAMMA-AMINOBUTYRIC ACID (GABA) A RECEPTOR, GAMMA 2	0.970229	GABRG2,	5q31.1-q33.1,
2571	GLUTAMATE DECARBOXYLASE 1 (BRAIN, 67KDA)	0.827121	GAD1,	2q31,
2572	GLUTAMATE DECARBOXYLASE 2 (PANCREATIC ISLETS AND BRAIN, 65KDA)	0.861384	Gad2,	10p11.23,
2624	GATA BINDING PROTEIN 2	0.451067	GATA2,	3q21.3,
2664	GDP DISSOCIATION INHIBITOR 1	0.881671	GDI1,	Xq28,
2697	GAP JUNCTION PROTEIN, ALPHA 1, 43KDA (CONNEXIN 43)	0.880086	GJA1,	6q21-q23.2,
2885	GROWTH FACTOR RECEPTOR-BOUND PROTEIN 2	0.778264	grb2,	17q24-q25,
2902	GLUTAMATE RECEPTOR, IONOTROPIC, N-METHYL D-ASPARTATE 1	0.922132	GRIN1,	9q34.3,
3482	INSULIN-LIKE GROWTH FACTOR 2 RECEPTOR	0.711091	IGF2R,	6q26,
3572	INTERLEUKIN 6 SIGNAL TRANSDUCER (GP130, ONCOSTATIN M RECEPTOR)	0.823879	Il6st,	5q11,
3708	INOSITOL 1,4,5-TRIPHOSPHATE RECEPTOR, TYPE 1	0.900152	Itpr1,	3p26-p25,
3742	POTASSIUM VOLTAGE-GATED CHANNEL, SHAKER-RELATED SUBFAMILY, MEMBER 6	0.930653	KCNA6,	12p13,
3751	POTASSIUM VOLTAGE-GATED CHANNEL, SHAL-RELATED SUBFAMILY, MEMBER 2	0.84677	KCND2,	7q31,
3757	POTASSIUM VOLTAGE-GATED CHANNEL, SUBFAMILY H (EAG-RELATED), MEMBER 2	0.56902	KCNH2,	7q35-q36,
3778	POTASSIUM LARGE CONDUCTANCE CALCIUM-ACTIVATED CHANNEL, SUBFAMILY M, ALPHA MEMBER 1	0.962372	KCNMA1,	10q22.3,
3798	KINESIN FAMILY MEMBER 5A	0.859905	KIF5A,	12q13.13,
3799	KINESIN FAMILY MEMBER 5B	0.728724	KIF5B,	10pter-q22.1,
3836	KARYOPHERIN ALPHA 1 (IMPORTIN ALPHA 5)	0.900401	Kpna1,	3q21,
3839	KARYOPHERIN ALPHA 3 (IMPORTIN ALPHA 4)	0.36849	KPNA3,	13q14.3,
3927	LIM AND SH3 PROTEIN 1	0.501139	lasp1,	17q11-q21.3,
4035	LOW DENSITY LIPOPROTEIN-RELATED PROTEIN 1 (ALPHA-2-MACROGLOBULIN RECEPTOR)	0.830517	LRP1,	12q13-q14,
4088	SMAD, MOTHERS AGAINST DPP HOMOLOG 3 (DROSOPHILA)	0.598315	SMAD3,	15q22.33,
4215	MITOGEN-ACTIVATED PROTEIN KINASE KINASE KINASE 3	0.200237	MAP3K3,	17q23.3,
4664	NGFI-A BINDING PROTEIN 1 (EGR1 BINDING PROTEIN 1)	0.723525	NAB1,	2q32.3-q33,
4884	NEURONAL PENTRAXIN I	0.955618	NPTX1,	17q25.1-q25.2,
4929	NUCLEAR RECEPTOR SUBFAMILY 4, GROUP A, MEMBER 2	0.829172	NR4A2,	2q22-q23,
5046	PROPROTEIN CONVERTASE SUBTILISIN/KEXIN TYPE 6	0.91326	PCSK6,	15q26.3,
5048	PLATELET-ACTIVATING FACTOR ACETYLHYDROLASE, ISOFORM IB, ALPHA SUBUNIT 45KDA	0.842709	PAFAH1B1,	17p13.3,
5126	PROPROTEIN CONVERTASE SUBTILISIN/KEXIN TYPE 2	0.793903	PCSK2,	20p11.2,
5306	PHOSPHATIDYLINOSITOL TRANSFER PROTEIN, ALPHA	0.90355	PITPNA,	17p13.3,
5376	PERIPHERAL MYELIN PROTEIN 22	0.908145	pmp22,	17p12-p11.2,
5604	MITOGEN-ACTIVATED PROTEIN KINASE KINASE 1	0.764615	Map2k1,	15q22.1-q22.33,
5861	RAB1A, MEMBER RAS ONCOGENE FAMILY	0.813275	RAB1A,	2p14,
5870	RAB6A, MEMBER RAS ONCOGENE FAMILY	0.381956	RAB6A,	11q13.3,
5979	RET PROTO-ONCOGENE (MULTIPLE ENDOCRINE NEOPLASIA AND MEDULLARY THYROID CARCINOMA 1, HIRSCHSPRUNG DISEASE)	0.196739	RET,	10q11.2,
6376	CHEMOKINE (C-X3-C MOTIF) LIGAND 1	0.953092	Cx3cl1,	16q13,
6446	SERUM/GLUCOCORTICOID REGULATED KINASE	0.507786	SGK1,	6q23,
6456	SH3-DOMAIN GRB2-LIKE 2	0.893789	sh3gl2,	9p22,
6506	SOLUTE CARRIER FAMILY 1 (GLIAL HIGH AFFINITY GLUTAMATE TRANSPORTER), MEMBER 2	0.670769	Slc1a2,	11p13-p12,
6515	SOLUTE CARRIER FAMILY 2 (FACILITATED GLUCOSE TRANSPORTER), MEMBER 3	0.91641	SLC2A3,	12p13.3,
6529	SOLUTE CARRIER FAMILY 6 (NEUROTRANSMITTER TRANSPORTER, GABA), MEMBER 1	0.946978	SLC6A1,	3p25-p24,
6532	SOLUTE CARRIER FAMILY 6 (NEUROTRANSMITTER TRANSPORTER, SEROTONIN), MEMBER 4	0.490687	SLC6A4,	17q11.1-q12,
6558	SOLUTE CARRIER FAMILY 12 (SODIUM/POTASSIUM/CHLORIDE TRANSPORTERS), MEMBER 2	0.912977	SLC12A2,	5q23.3,
6616	SYNAPTOSOMAL-ASSOCIATED PROTEIN, 25KDA	0.984316	Snap25,	20p12-p11.2,
6712	SPECTRIN, BETA, NON-ERYTHROCYTIC 2	0.865148	SPTBN2,	11q13,
6804	SYNTAXIN 1A (BRAIN)	0.320639	Stx1a,	7q11.23,
6812	SYNTAXIN BINDING PROTEIN 1	0.940865	Stxbp1,	9q34.1,
6814	SYNTAXIN BINDING PROTEIN 3	0.682749	stxbp3,	1p13.3,
6844	VESICLE-ASSOCIATED MEMBRANE PROTEIN 2 (SYNAPTOBREVIN 2)	0.853874	Vamp2,	17p13.1,
6856	SYNAPTOPHYSIN-LIKE 1	0.500963	SYPL1,	7q22.2,
6857	SYNAPTOTAGMIN I	0.835019	SYT1,	12cen-q21,
6860	SYNAPTOTAGMIN IV	0.663334	Syt4,	18q12.3,
7476	WINGLESS-TYPE MMTV INTEGRATION SITE FAMILY, MEMBER 7A	0.84178	Wnt7a,	3p25,
7529	TYROSINE 3-MONOOXYGENASE/TRYPTOPHAN 5-MONOOXYGENASE ACTIVATION PROTEIN, BETA POLYPEPTIDE	0.497915	YWHAB,	20q13.1,
7533	TYROSINE 3-MONOOXYGENASE/TRYPTOPHAN 5-MONOOXYGENASE ACTIVATION PROTEIN, ETA POLYPEPTIDE	0.876232	ywhah,	22q12.3,
7881	POTASSIUM VOLTAGE-GATED CHANNEL, SHAKER-RELATED SUBFAMILY, BETA MEMBER 1	0.89736	KCNAB1,	3q26.1,
8673	VESICLE-ASSOCIATED MEMBRANE PROTEIN 8 (ENDOBREVIN)	0.751568	VAMP8,	2p12-p11.2,
8997	KALIRIN, RHOGEF KINASE	0.943365	KALRN,	3q21.1-q21.2,
9371	KINESIN FAMILY MEMBER 3B	-0.250705	Kif3b,	20q11.21,
9807	INOSITOL HEXAPHOSPHATE KINASE 1	0.758777	Ihpk1,	3p21.31,
9874	TOUSLED-LIKE KINASE 1	0.60463	TLK1,	2q31.1,
9900	SYNAPTIC VESICLE GLYCOPROTEIN 2A	0.928978	Sv2a,	1q21.2,
10057	ATP-BINDING CASSETTE, SUB-FAMILY C (CFTR/MRP), MEMBER 5	0.320715	ABCC5,	3q27,
10188	TYROSINE KINASE, NON-RECEPTOR, 2	0.781369	Tnk2,	3q29,
10313	RETICULON 3	0.918532	rtn3,	11q13,
10440	TRANSLOCASE OF INNER MITOCHONDRIAL MEMBRANE 17 HOMOLOG A (YEAST)	0.845603	TIMM17A,	1q32.1,
10565	ADP-RIBOSYLATION FACTOR GUANINE NUCLEOTIDE-EXCHANGE FACTOR 1(BREFELDIN A-INHIBITED)	0.278295	ARFGEF1,	8q13,
10580	SORBIN AND SH3 DOMAIN CONTAINING 1	0.707201	SORBS1,	10q23.3-q24.1,
10776	CYCLIC AMP PHOSPHOPROTEIN, 19 KD	0.912042	ARPP-19,	15q21.2,
11276	AP1 GAMMA SUBUNIT BINDING PROTEIN 1	0.748051	AP1GBP1,	17q12,
23428	SOLUTE CARRIER FAMILY 7 (CATIONIC AMINO ACID TRANSPORTER, Y+ SYSTEM), MEMBER 8	0.919999	Slc7a8,	14q11.2,
23710	GABA(A) RECEPTOR-ASSOCIATED PROTEIN LIKE 1	0.831016	Gabarapl1,	12p13.2,
25777	UNC-84 HOMOLOG B (C. ELEGANS)	0.792091	UNC84B,	22q13.1,
27020	NEUROPLASTIN	0.878623	NPTN,	15q22,
29979	UBIQUILIN 1	0.819067	UBQLN1,	9q22,
29993	PROTEIN KINASE C AND CASEIN KINASE SUBSTRATE IN NEURONS 1	0.886885	PACSIN1,	6p21.3,
50618	SH3 DOMAIN PROTEIN 1B	0.0460428	ITSN2,	2pter-p25.1,
54793	POTASSIUM CHANNEL TETRAMERISATION DOMAIN CONTAINING 9	0.923816	kctd9,	8p21.1,
55614	CHROMOSOME 20 OPEN READING FRAME 23	0.803769	C20orf23,	20p11.23,
79572	ATPASE TYPE 13A3	0.451069	ATP13A3,	3q29,
80727	TWEETY HOMOLOG 3 (DROSOPHILA)	0.32813	TTYH3,	7p22,
81876	RAB1B, MEMBER RAS ONCOGENE FAMILY	0.854513	RAB1B,	11q12,
123591	CHROMOSOME 15 OPEN READING FRAME 27	0.983303	C15orf27,	15q24.2,
